# Supplementary material
Source: PubMed Central journal article supplement (PMC5619971)
Supplement: ASN.2017010043SupplementaryData.pdf [file ASN.2017010043SupplementaryData.pdf]

## Supplemental methods

### *Targeted exome sequencing: design, sequencing, and prioritization of the variants*

We developed a targeted exome sequencing strategy focusing on 330 genes (Table S2) including (a) known causative or likely causative genes, with mutations reported in the literature in cases with isolated and/or syndromic CAKUT (55 genes),<sup>1-50</sup> (b) genes whose knock-out in mouse lead to kidney developmental defects (104 genes),<sup>51-142</sup> (c) genes involved in cellular processes/signaling pathways relevant for kidney development (84 genes),<sup>143-200</sup> (d) genes with a role in ureter/bladder development (11 genes),<sup>201,202</sup> (e) potential targets of transcription factors WT1 or HNF1B (57 genes),<sup>204-206</sup> and (f) gene related to gene(s) in group (a) to (e), expressed during kidney/LUT development (19 genes). A custom SureSelect gene panel was designed using the SureDesign software (Agilent). The target regions covered 1.38 Mb, including coding exons and splice junctions of the 330 genes. Illumina compatible precapture barecoded genomic DNA libraries were constructed according to the manufacturer's protocol (Ovation Ultralow, Nugen Technologies). Briefly, 1 to 3 µg of each double strand genomic DNA was mechanically fragmented to a median size of 200 pb using a Covaris, 100 ng was end-repaired and Illumina compatible adaptors containing a specific 8 bases barcode were ligated to the repaired ends (one specific barcode per patient). DNA fragments were PCR amplified to get the final precapture barecoded libraries and series of 16 or 36 barecoded libraries were pooled at equimolar concentrations. The capture process was performed according to the SureSelect protocol (Agilent) using 750 ng of the pool and 2µl or 3µl of biotinylated probes from the SureSelect panel (for pools of 16 or 36 libraries respectively). The barecoded libraries molecules complementary to the biotinylated probes retained by streptavidine coated magnetic beads were PCR amplified to generate a final pool of postcapture libraries. Sequencing was performed on an Illumina HiSeq2500 (Paired-End sequencing 130 x130 bases, High

Throughput Mode, 36 libraries per lane). After demultiplexing, sequences were aligned to the reference human genome hg19 using the Burrows-Wheeler Aligner. Downstream processing was carried out with the Genome Analysis Toolkit (GATK), SAMtools and Picard, following documented best practices (<https://software.broadinstitute.org/gatk/best-practices/>). Variant calls were made with the GATK Unified Genotyper. The annotation process was based on the latest release of the Ensembl database. Variants were annotated and analysed using the Polyweb software interface designed by the Bioinformatics platform of University Paris Descartes.

Prioritization of the variants was performed thanks to the polyweb interface. For known CAKUT genes, we filtered the variants whose frequency in ExAC was higher than 0,02% for genes reported in dominant CAKUT, or higher than 0,1% for those reported in recessive forms. For candidate genes, more stringent criteria were used in order to focus on the most promising genes and only variants absent in ExAC were retained. In addition, all variants identified in our in-house database (> 8000 exomes) in more than 5 independent sequencing projects of patients with various non-CAKUT phenotypes were eliminated. For missense variants, prediction of damaging effect was based on PolyPhen2,<sup>207</sup> Sift,<sup>208</sup> Mutation Taster,<sup>209</sup> Grantham score,<sup>210</sup> and GVG D.<sup>211</sup> Prediction of the effect of variants on splicing were based on SpliceSiteFinder, MaxEntScan, NNSPLICE, GeneSplicer and HumanSplicingFinder through Alamut.<sup>212</sup>

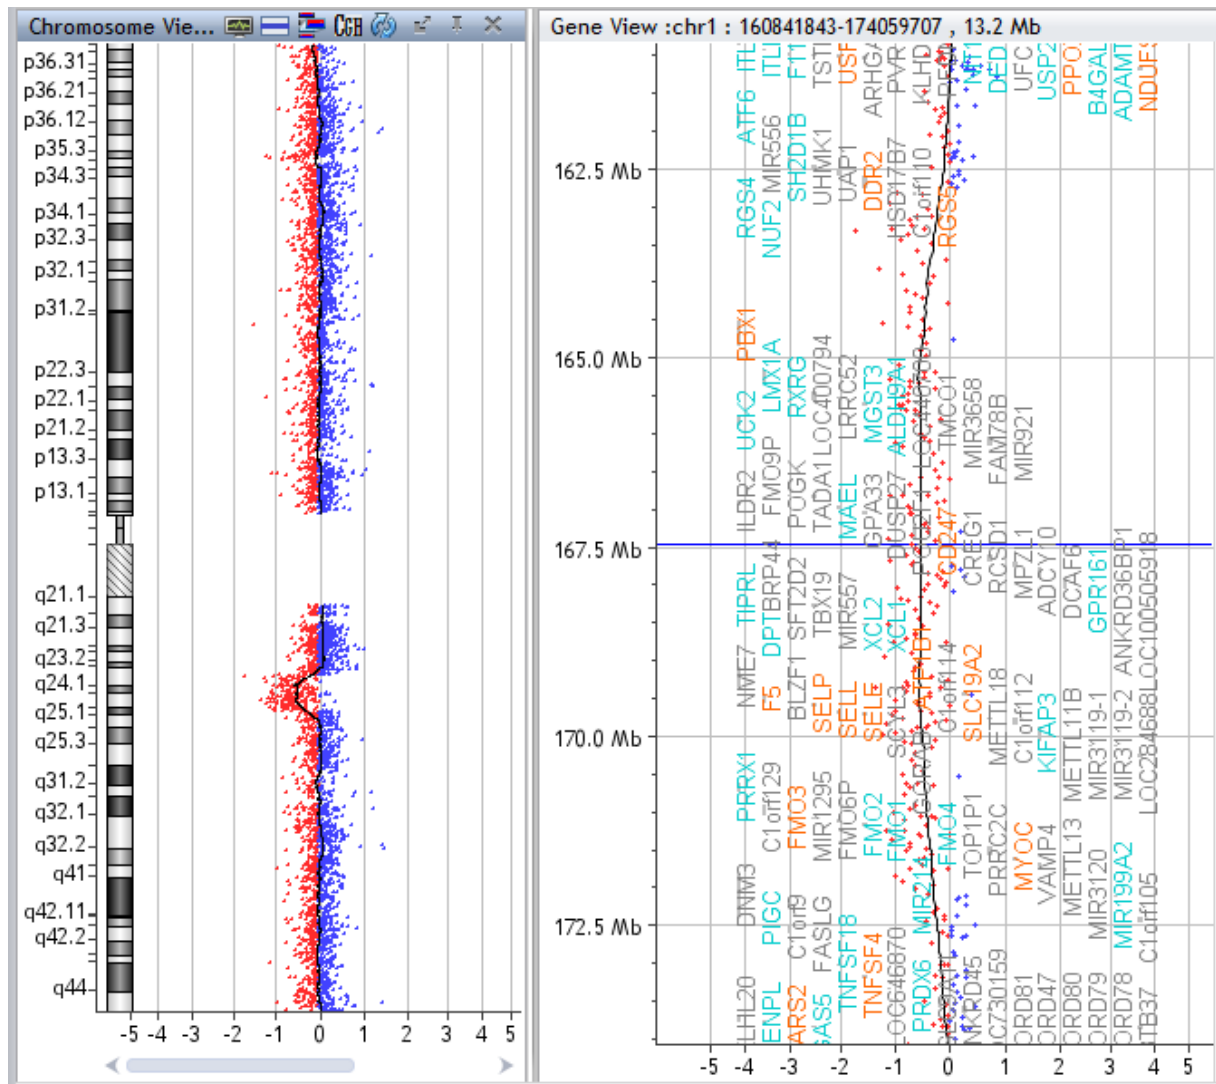

**Figure S1 : Identification of a mosaic deletion including *PBX1* in the long arm of chromosome 1 in case K136 by CGH array**

Array CGH analysis of DNA extracted from lymphocytes of case K136 was performed on an Agilent 60K oligonucleotide microarray (Agilent Technologies, Santa Clara, CA, USA). Result showing the 1q23.3q24.3 deletion (left). Vertical and horizontal axes indicate the genomic location and signal log<sub>2</sub> ratio, respectively. The mean log<sub>2</sub> ratio of the aberration region is -0.465, indicating mosaic deletion (right). The aneusomic segment was approximately 9.1 Mb in size, with proximal and distal breakpoints at 162,824,523 bp and 172,011,180 bp (GRCh 37, Hg19). This region includes *PBX1* and ~ 130 other genes.

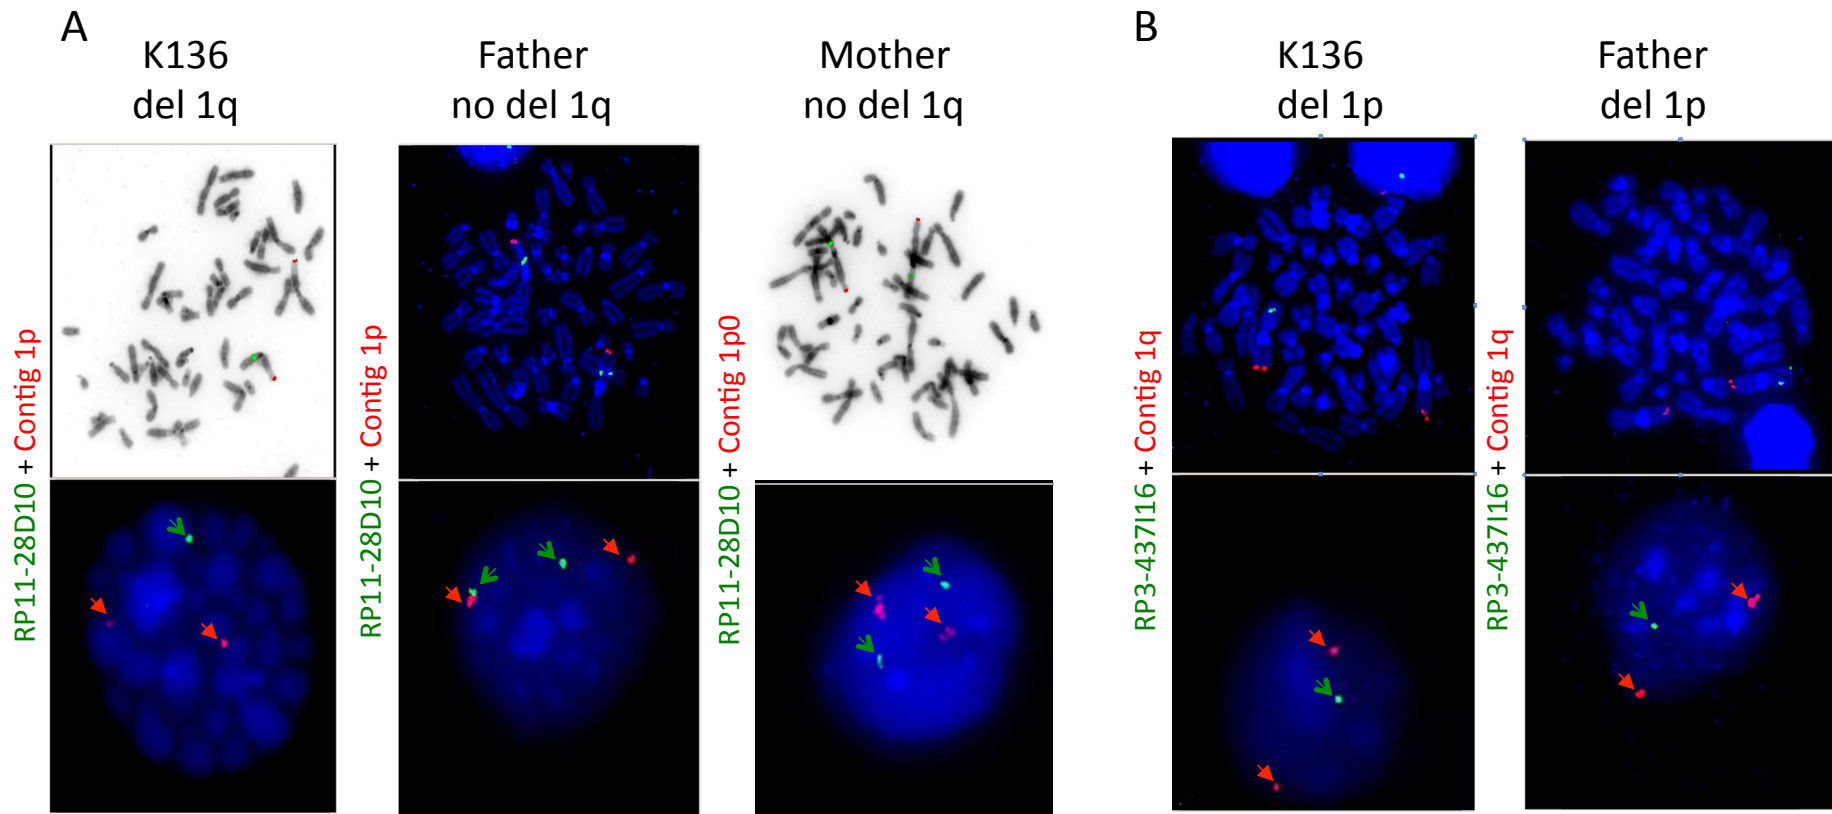

**Figure S2: Fluorescent in situ hybridization experiments showing (A) *de novo* occurrence of the 1q deletion including *PBX1* and (B) inheritance of a paternal 1p deletion in case K136 (family 5)**

BAC clones RP11-28D10 located in chr1:167,722,147 - 167,722,642; RP3-437I16 located in chr1:29,528,719-29,549,213

## PBX1

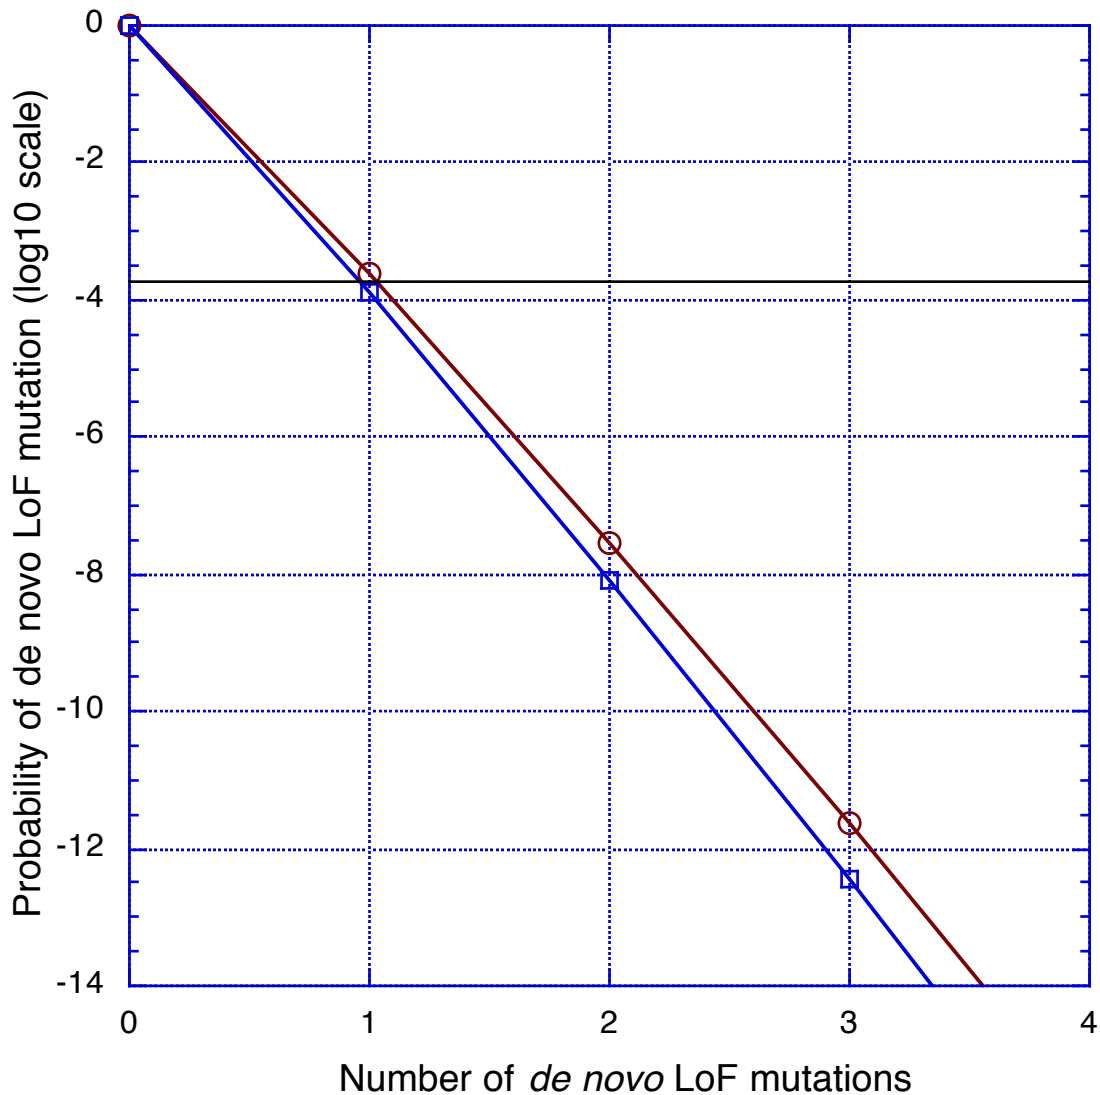

**Figure S3: Result of a binomial test showing the probability that one or more *de novo* loss of function mutations in *PBX1* would occur by chance only in a cohort of 204 CAKUT cases.**

Calculated and empirical values of probability for *de novo* loss-of-function mutations in *PBX1* were considered: (1) blue line:  $p = 6.4 \times 10^{-7}$  = mean of values computed by Samocha et al for nonsense ( $7.8 \times 10^{-7}$ ), frameshift ( $8.2 \times 10^{-7}$ ) and splice site mutations ( $3.3 \times 10^{-7}$ ) in *PBX1*;<sup>213</sup> (2) red line:  $p = 1.2 \times 10^{-6}$ , corresponding to empirical frequency of *de novo* loss of function mutations per exome per generation (0.03 per-generation),<sup>214</sup> according to the size of the coding sequence of *PBX1* (1293 bp). The black line indicates the Bonferroni corrected significance threshold ( $1.5 \times 10^{-4}$ ) for 330 genes. The p-value for 3 mutations is  $3.6 \times 10^{-13}$ .

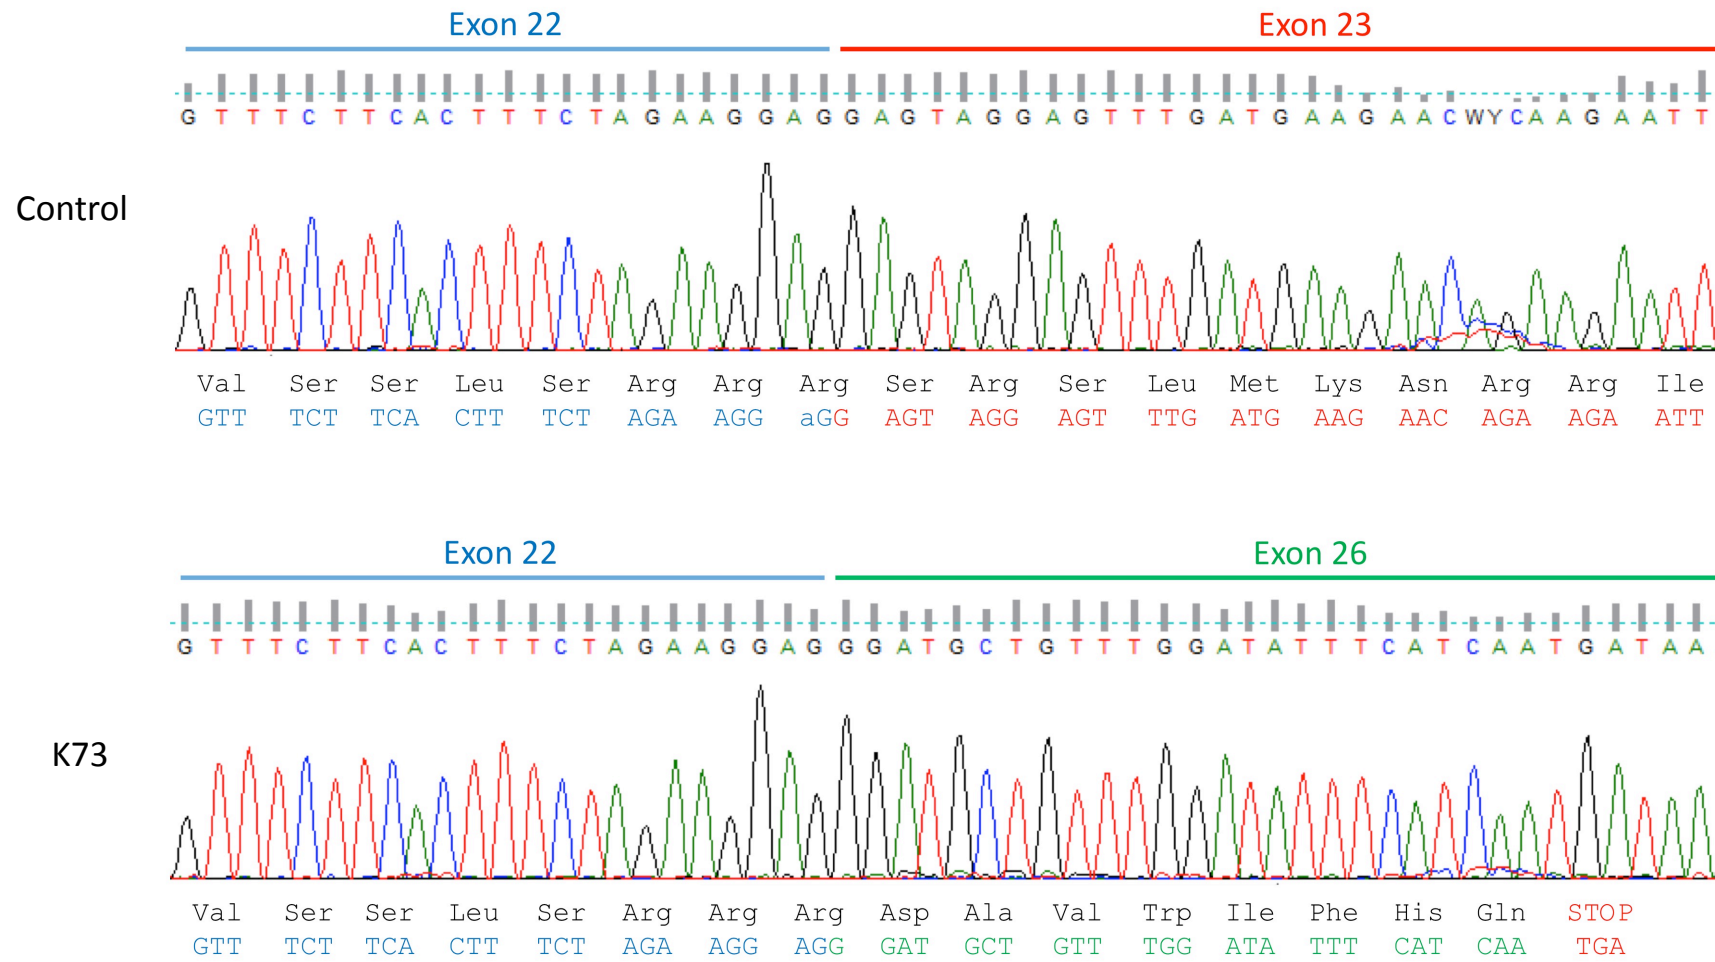

**Figure S4: cDNA sequencing showing deletion of exons 23-25 with creation of a premature stop codon in case K73**

| Table S1. Phenotypes of all cases and variants identified |     |       |                         |     |     |       |      |      |      |      |      |          |         |      |                           |              |                      |                 |                                                                               |                                     |                                                                  |                                                                     |                                                                                     |                          |
|-----------------------------------------------------------|-----|-------|-------------------------|-----|-----|-------|------|------|------|------|------|----------|---------|------|---------------------------|--------------|----------------------|-----------------|-------------------------------------------------------------------------------|-------------------------------------|------------------------------------------------------------------|---------------------------------------------------------------------|-------------------------------------------------------------------------------------|--------------------------|
| Case                                                      | Sex | Fetus | Renal phenotype acronym | RHa | RDb | Cysts | UMDc | BMDd | UKAe | BKAf | VURg | ObMegaUh | Duplexi | PUOj | Unprecised hydronephrosis | Renal ectopy | Family (1st degree)k | Family (other)l | Extra-renal phenotype                                                         | Causative mutations                 | Rare damaging variants in dominant CAKUT genes (<1/5000 in ExAC) | Reported variants in dominant CAKUT genes (>1/5000, <1/100 in ExAC) | Rare damaging variants in candidate genes <sup>m</sup> (absent from ExAC)           |                          |
| Cases with CAKUT phenotype                                |     |       |                         |     |     |       |      |      |      |      |      |          |         |      |                           |              |                      |                 |                                                                               |                                     |                                                                  |                                                                     |                                                                                     |                          |
| K1                                                        | F   |       | RH                      | 1   |     |       |      |      |      |      |      |          |         |      |                           |              |                      |                 |                                                                               |                                     |                                                                  |                                                                     | MMP9, p.[Arg322Trp];[=]<br>PDE3B, p.[Leu92Argfs*241];[=]<br>HIC1, p.[Pro230Ser];[=] |                          |
| K2                                                        | M   |       | RH                      | 1   |     |       |      |      |      |      |      |          |         |      |                           |              |                      |                 |                                                                               |                                     |                                                                  |                                                                     |                                                                                     |                          |
| K3                                                        | M   | fetus | BKA                     |     |     |       |      |      |      | 1    |      |          |         |      |                           |              | 1                    |                 | hypospadias + polydactyly<br>righ ventricular dilation                        |                                     |                                                                  | RET, p.[Asp567Asn];[=]                                              |                                                                                     |                          |
| K4                                                        | F   |       | RH                      | 1   |     |       |      |      |      |      |      |          |         |      |                           |              |                      |                 | bifid uterus                                                                  | HNF1B, c.[(?) -30] (*220 ?)del];[=] |                                                                  |                                                                     |                                                                                     |                          |
| K5                                                        | M   | fetus | BKA                     |     |     |       |      |      |      | 1    |      |          |         |      |                           |              |                      |                 |                                                                               |                                     |                                                                  |                                                                     | LHX1, p.[Thr90Ile];[=]                                                              |                          |
| K6                                                        | F   |       | UKA                     |     |     |       |      |      | 1    |      |      |          |         |      |                           |              |                      |                 | mullerian duplication<br>aortic stenosis                                      |                                     |                                                                  |                                                                     |                                                                                     |                          |
| K7                                                        | M   | fetus | BKA                     |     |     |       |      |      |      | 1    |      |          |         |      |                           |              |                      |                 |                                                                               |                                     |                                                                  |                                                                     |                                                                                     |                          |
| K8                                                        | F   | fetus | BKA                     |     |     |       |      |      |      | 1    |      |          |         |      |                           |              |                      |                 | ephageal atresia + imperforate anus +<br>13th pair of ribs + vertebral fusion |                                     |                                                                  |                                                                     |                                                                                     |                          |
| K9                                                        | M   | fetus | BKA                     |     |     |       |      |      |      | 1    |      |          |         |      |                           |              | 1                    |                 |                                                                               |                                     |                                                                  |                                                                     | SHH, p.[Val366Ala];[=]                                                              |                          |
| K10                                                       | M   | fetus | BKA                     |     |     |       |      |      |      | 1    |      |          |         |      |                           |              |                      |                 |                                                                               |                                     |                                                                  |                                                                     | SPOCK2, p.[Lys398Glu];[=]                                                           |                          |
| K11                                                       | M   | fetus | UKA+                    |     |     |       | 1    |      | 1    |      |      |          |         |      |                           |              |                      |                 |                                                                               |                                     |                                                                  |                                                                     | KIF3A, p.[Glu379Lys];[=]                                                            |                          |
| K12                                                       | M   | fetus | BKA                     |     |     |       |      |      |      | 1    |      |          |         |      |                           |              |                      |                 |                                                                               |                                     |                                                                  |                                                                     |                                                                                     |                          |
| K13                                                       | NA  | fetus | BMD                     |     |     |       |      | 1    |      |      |      |          |         |      |                           |              |                      |                 |                                                                               |                                     |                                                                  |                                                                     | DCHS1, p.[Ala2216Val];[=]                                                           |                          |
| K14                                                       | F   |       | RH                      | 1   |     |       |      |      |      |      |      |          |         |      |                           |              |                      |                 | urogenital sinus                                                              |                                     |                                                                  |                                                                     | MAGED1, p.[Ala738Val];[=]                                                           |                          |
| K15                                                       | M   | fetus | BKA                     |     |     |       |      |      |      | 1    |      |          |         |      |                           |              |                      | 1               | pulmonary isomerism + 11 pairs of<br>ribs                                     |                                     |                                                                  |                                                                     |                                                                                     |                          |
| K16                                                       | M   | fetus | BKA                     |     |     |       |      |      |      | 1    |      |          |         |      |                           |              |                      |                 |                                                                               |                                     |                                                                  |                                                                     |                                                                                     |                          |
| K17                                                       | F   |       | UKA+                    |     |     |       |      |      | 1    |      | 1    |          | 1       |      |                           |              |                      | 1               |                                                                               |                                     |                                                                  |                                                                     |                                                                                     | FRY, p.[Ala1643Val];[=]  |
| K18                                                       | M   | fetus | BMD                     |     |     |       | 1    |      |      |      |      |          |         |      |                           |              |                      |                 |                                                                               |                                     |                                                                  |                                                                     |                                                                                     |                          |
| K19                                                       | F   | fetus | BKA                     |     |     |       |      |      |      | 1    |      |          |         |      |                           |              |                      |                 | uterus and fallopian tubes agenesis                                           |                                     |                                                                  |                                                                     |                                                                                     |                          |
| K20                                                       | M   | fetus | RD                      |     | 1   | 1     |      |      |      |      |      |          |         |      |                           |              |                      |                 | liver cysts + pancreatitis                                                    |                                     |                                                                  |                                                                     | ENC1, p.[Tyr220His];[=]                                                             |                          |
| K21                                                       | M   | fetus | BMD                     |     |     |       |      | 1    |      |      |      |          |         |      |                           |              |                      |                 |                                                                               |                                     |                                                                  |                                                                     | TBX18, p.[His204Tyr];[=]                                                            |                          |
| K22                                                       | M   |       | RH+                     | 1   | 1   |       |      |      |      |      |      |          |         |      |                           |              |                      | 1               |                                                                               |                                     |                                                                  |                                                                     |                                                                                     |                          |
| K23                                                       | F   | fetus | BKA                     |     |     |       |      |      |      | 1    |      |          |         |      |                           |              |                      |                 | left diaphragmatic hernia                                                     |                                     |                                                                  |                                                                     |                                                                                     |                          |
| K24                                                       | M   | fetus | BKA                     |     |     |       |      |      |      | 1    |      |          |         |      |                           |              |                      |                 |                                                                               |                                     |                                                                  |                                                                     |                                                                                     |                          |
| K25                                                       | M   | fetus | UKA+                    |     |     |       | 1    |      | 1    |      |      |          |         |      |                           |              |                      |                 | intrauterine growth retardation                                               |                                     |                                                                  |                                                                     |                                                                                     |                          |
| K26                                                       | M   | fetus | BKA                     |     |     |       |      |      |      | 1    |      |          |         |      |                           |              |                      |                 |                                                                               |                                     |                                                                  |                                                                     | ANOS1, p.[Arg257*];[=]                                                              |                          |
| K27                                                       | M   | fetus | UKA+                    |     | 1   | 1     |      |      |      | 1    |      |          |         |      |                           |              |                      |                 | left diaphragmatic hernia +<br>imperforate anus + hypospadias                 |                                     |                                                                  |                                                                     |                                                                                     |                          |
| K28                                                       | M   | fetus | BKA                     |     |     |       |      |      |      | 1    |      |          |         |      |                           |              |                      |                 | ear tag                                                                       |                                     |                                                                  |                                                                     | LHX1, p.[Asn230His];[=]<br>WNT6, p.[Gly196Alafs*123];[=]                            |                          |
| K29                                                       | M   | fetus | BKA                     |     |     |       |      |      |      | 1    |      |          |         |      |                           |              |                      |                 |                                                                               |                                     |                                                                  |                                                                     | SIX5, p.[Ser730Leu];[=]                                                             |                          |
| K30                                                       | M   |       | UMD+                    |     | 1   |       | 1    |      |      |      |      |          |         |      |                           |              |                      |                 |                                                                               |                                     |                                                                  |                                                                     |                                                                                     |                          |
| K31                                                       | M   |       | RH+                     | 1   | 1   |       |      |      |      |      |      |          |         |      |                           |              |                      | 1               |                                                                               |                                     |                                                                  |                                                                     | WNT9B, p.[Cys145Tyr];[=]                                                            |                          |
| K32                                                       | F   | fetus | RH                      | 1   |     |       |      |      |      |      |      |          |         |      |                           |              |                      |                 |                                                                               |                                     |                                                                  |                                                                     | NOTCH2, p.[Asp355Asn];[=]                                                           |                          |
| K33                                                       | M   |       | UMD+                    |     | 1   | 1     | 1    |      |      |      |      |          |         | 1    |                           |              |                      |                 |                                                                               |                                     |                                                                  |                                                                     | RET, p.[Arg694Gln];[=]                                                              |                          |
| K34                                                       | M   | fetus | BKA                     |     |     |       |      |      |      |      | 1    |          |         |      |                           |              |                      |                 | testis agenesis                                                               |                                     |                                                                  |                                                                     |                                                                                     | CRIM1, p.[Gly634Glu];[=] |
| K35                                                       | M   |       | RH+                     | 1   |     |       |      |      |      |      | 1    |          |         |      |                           |              |                      | 1               |                                                                               |                                     |                                                                  |                                                                     |                                                                                     |                          |
| K36                                                       | F   |       | UKA+                    | 1   |     |       |      |      | 1    |      |      |          |         |      |                           |              |                      |                 |                                                                               |                                     |                                                                  |                                                                     |                                                                                     |                          |
| K37                                                       | F   | fetus | UKA+                    |     |     |       | 1    |      | 1    |      |      |          |         |      |                           |              |                      |                 |                                                                               |                                     |                                                                  |                                                                     |                                                                                     |                          |
| K38                                                       | M   | fetus | UKA+                    |     |     |       | 1    |      | 1    |      |      |          |         |      |                           |              |                      |                 |                                                                               |                                     |                                                                  |                                                                     |                                                                                     |                          |
| K39                                                       | F   | fetus | UKA+                    |     |     |       | 1    |      | 1    |      |      |          |         |      |                           |              | 1                    | 1               | megalourethra                                                                 |                                     |                                                                  |                                                                     | PIK3C3, p.[Phe597His];[=]<br>RSPO3, p.[Lys161Gln];[=]                               |                          |
| K40                                                       | F   | fetus | BKA                     |     |     |       |      |      |      | 1    |      |          |         |      |                           |              |                      |                 |                                                                               |                                     |                                                                  |                                                                     |                                                                                     |                          |
| K41                                                       | M   | fetus | BKA                     |     |     |       |      |      |      | 1    |      |          |         |      |                           |              |                      |                 |                                                                               |                                     |                                                                  |                                                                     |                                                                                     |                          |
| K42                                                       | F   | fetus | Oth                     |     |     |       |      |      |      |      |      |          |         |      | 1                         |              |                      |                 |                                                                               |                                     |                                                                  |                                                                     |                                                                                     |                          |
| K43                                                       | F   | fetus | RH+                     | 1   | 1   |       |      |      |      |      |      |          |         |      |                           |              |                      |                 | heart defect + partial pancreas<br>agenesis                                   |                                     |                                                                  |                                                                     | ETV4, p.[Tyr209Cys];[=]                                                             |                          |
| K44                                                       | NA  | fetus | UKA+                    |     |     |       |      |      | 1    |      |      |          |         |      |                           |              |                      |                 |                                                                               |                                     |                                                                  |                                                                     |                                                                                     |                          |
| K45                                                       | F   | fetus | BMD                     |     |     |       |      | 1    |      |      |      |          |         |      |                           |              |                      |                 | accessory spleen                                                              |                                     |                                                                  |                                                                     | GNB3, p.[Val276Gly];[=]                                                             |                          |
| K46                                                       | M   | fetus | BMD                     |     |     |       |      | 1    |      |      |      |          |         |      |                           |              |                      |                 |                                                                               |                                     |                                                                  |                                                                     | TGM5, p.[Thr590Arg];[=]                                                             |                          |
| K47                                                       | M   |       | RH+                     | 1   | 1   |       |      |      |      |      | 1    |          |         |      |                           |              |                      |                 |                                                                               |                                     |                                                                  |                                                                     | KISS1R, p.[Ala135Ser];[=]                                                           |                          |
| K48                                                       | M   | fetus | RH+                     | 1   | 1   | 1     |      |      |      |      |      |          |         |      |                           |              |                      |                 |                                                                               |                                     |                                                                  |                                                                     |                                                                                     |                          |
| K49                                                       | M   | fetus | BKA                     |     |     |       |      |      |      | 1    |      |          |         |      |                           |              |                      |                 |                                                                               |                                     |                                                                  |                                                                     |                                                                                     |                          |
| K50                                                       | F   |       | UMD+                    |     |     |       | 1    |      |      |      | 1    |          |         |      |                           |              |                      |                 |                                                                               |                                     |                                                                  |                                                                     |                                                                                     |                          |
| K51                                                       | F   | fetus | BMD                     |     |     |       |      | 1    |      |      |      |          |         |      |                           |              |                      |                 |                                                                               |                                     |                                                                  |                                                                     |                                                                                     |                          |
| K52                                                       | F   | fetus | RD                      |     | 1   | 1     |      |      |      |      |      |          |         |      |                           |              |                      |                 | unicornuate uterus                                                            | HNF1B, c.[(?) -30] (*220 ?)del];[=] |                                                                  |                                                                     |                                                                                     | SULF2, p.[Thr766Ile];[=] |
| K53                                                       | NA  | fetus | UKA+                    | 1   |     |       |      |      | 1    |      |      |          |         |      |                           |              |                      |                 |                                                                               |                                     |                                                                  |                                                                     | GREM1, p.[Gly9Cysts*16];[=]                                                         |                          |









|      |   |  |  |  |  |  |  |  |  |  |  |  |  |  |  |  |  |  |                                                  |                             |                          |                         |                                                       |
|------|---|--|--|--|--|--|--|--|--|--|--|--|--|--|--|--|--|--|--------------------------------------------------|-----------------------------|--------------------------|-------------------------|-------------------------------------------------------|
| BO4  | F |  |  |  |  |  |  |  |  |  |  |  |  |  |  |  |  |  | branchial defect + preauricular pit + deafness   | EVA1, p.[Arg361*];[=]       |                          |                         |                                                       |
| BO5  | M |  |  |  |  |  |  |  |  |  |  |  |  |  |  |  |  |  | branchial defect + deafness                      | SIX1, p.[Tyr92Leufs*62];[=] |                          |                         | SCRIB, p.[Arg1641Cys];[=]<br>FAT1, p.[His1190Tyr];[=] |
| BO6  | M |  |  |  |  |  |  |  |  |  |  |  |  |  |  |  |  |  | ear tag + deafness                               |                             |                          |                         |                                                       |
| BO7  | M |  |  |  |  |  |  |  |  |  |  |  |  |  |  |  |  |  | preauricular pit + deafness                      |                             | TNXB, p.[Pro2490Arg];[=] |                         |                                                       |
| BO8  | M |  |  |  |  |  |  |  |  |  |  |  |  |  |  |  |  |  | external ear hypoplasia                          |                             |                          |                         |                                                       |
| BO9  | F |  |  |  |  |  |  |  |  |  |  |  |  |  |  |  |  |  | branchial defect                                 |                             |                          |                         |                                                       |
| BO10 | F |  |  |  |  |  |  |  |  |  |  |  |  |  |  |  |  |  | external ear defect + preauricular pit + ear tag |                             |                          |                         |                                                       |
| BO11 | M |  |  |  |  |  |  |  |  |  |  |  |  |  |  |  |  |  | deafness                                         |                             |                          | DSTYK, c.[654+1G>A];[=] |                                                       |

- (a) Renal Hypoplasia
- (b) Renal Dysplasia
- (c) Unilateral Multicystic Dysplasia
- (d) Bilateral Multicystic Dysplasia
- (e) Unilateral Kidney Agenesis
- (f) Bilateral Kidney Agenesis
- (g) Vesico-Ureteral Reflux
- (h) Obstructive Megaureter
- (i) Duplex kidney
- (j) Pelvi-ureteric junction Obstruction
- (k) Parents, children and/or siblings
- (l) Grand parents, uncles, aunts, cousins
- (m) *PBX1* mutations are in the "Causative mutations" column

**Table S2. List of genes for targeted exome sequencing**

| gene                                                     | Name                                                            | Phenotype/Syndrome                                                                 | OMIM#          | MGI#        | References |
|----------------------------------------------------------|-----------------------------------------------------------------|------------------------------------------------------------------------------------|----------------|-------------|------------|
| <b>a- Human mutations in CAKUT +/- syndrome</b>          |                                                                 |                                                                                    |                |             |            |
| <i>ACE</i>                                               | angiotensin I converting enzyme (peptidyl-dipeptidase A) 1      | Renal tubular dysgenesis                                                           | 106180         |             | 1          |
| <i>ACTA2</i>                                             | actin, alpha 2, smooth muscle, aorta                            | Prune Belly                                                                        |                |             | 2          |
| <i>ACTG2</i>                                             | actin, gamma 2, smooth muscle, enteric                          | Megacystis Microcolon<br>Intestinal Hypoperistalsis                                | 155310         |             | 3          |
| <i>AGT</i>                                               | angiotensinogen (serpin peptidase inhibitor, clade A, member 8) | Renal tubular dysgenesis                                                           | 106165         |             | 1          |
| <i>AGTR1</i>                                             | angiotensin II receptor, type 1a                                | Renal tubular dysgenesis                                                           | 106180         |             | 1          |
| <i>ANOS1</i>                                             | Anosmin                                                         | Kallmann                                                                           | 308700         |             | 4          |
| <i>BICC1</i>                                             | BicC family RNA binding protein 1                               | Cystic renal dysplasia                                                             | 601331         |             | 5          |
| <i>BMP4</i>                                              | bone morphogenetic protein 4                                    | Isolated CAKUT                                                                     |                |             | 6          |
| <i>CDC5L</i>                                             | cell division cycle 5-like (S. pombe)                           | Isolated CAKUT                                                                     |                |             | 7          |
| <i>CHD1L</i>                                             | chromodomain helicase DNA binding protein 1-like                | Isolated CAKUT                                                                     |                |             | 8          |
| <i>CHD7</i>                                              | chromodomain helicase DNA binding protein 7                     | Charge/Kallmann                                                                    | 214880/612370  |             | 9          |
| <i>CHRM3</i>                                             | cholinergic receptor, muscarinic 3, cardiac                     | Prune belly like                                                                   | 100100         |             | 10         |
| <i>DACH1</i>                                             | dachshund 1 (Drosophila)                                        | Cystic renal dysplasia                                                             |                |             | 11         |
| <i>DHCR7</i>                                             | 7-dehydrocholesterol reductase                                  | Smith-Lemli-Opitz                                                                  | 270400         |             | 12         |
| <i>DSTYK</i>                                             | dual serine/threonine and tyrosine protein kinase               | Isolated CAKUT                                                                     | 610805         |             | 13         |
| <i>ESRRG</i>                                             | estrogen-related receptor gamma                                 | Kidney agenesis                                                                    |                |             | 14         |
| <i>EYA1</i>                                              | EYA transcriptional coactivator and phosphatase 1               | Branchio oto renal                                                                 | 113650         |             | 15         |
| <i>FAM58A</i>                                            | family with sequence similarity 58, member B                    | Toe syndactyly, telecanthus,<br>anogenital and renal<br>malformations              | 300707         |             | 16         |
| <i>FGF20</i>                                             | fibroblast growth factor 20                                     | Kidney agenesis                                                                    | 615721         |             | 17         |
| <i>FRAS1</i>                                             | Fraser extracellular matrix complex subunit 1                   | Fraser/isolated CAKUT                                                              | 219000         |             | 18         |
| <i>FREM1</i>                                             | Fras1 related extracellular matrix protein 1                    | Bifid nose, renal agenesis &<br>anorectal malformations<br>syndrome/isolated CAKUT | 608980         |             | 19         |
| <i>FREM2</i>                                             | Fras1 related extracellular matrix protein 2                    | Fraser/isolated CAKUT                                                              | 219000         |             | 18         |
| <i>GATA3</i>                                             | GATA binding protein 3                                          | Hypoparathyroidism,<br>sensorineural deafness and<br>renal dysplasia               | 146255         |             | 20         |
| <i>GDF6</i>                                              | growth differentiation factor 6                                 | Klippel-Feil                                                                       | 118180         |             | 21         |
| <i>GLI3</i>                                              | GLI-Kruppel family member GLI3                                  | Pallister Hall                                                                     | 146510         |             | 22         |
| <i>GPC3</i>                                              | glypican 3                                                      | Simpson Golabi Behmel                                                              | 312870         |             | 23         |
| <i>GRIP1</i>                                             | glutamate receptor interacting protein 1                        | Fraser/isolated CAKUT                                                              | 219000         |             | 24         |
| <i>HNF1B</i>                                             | HNF1 homeobox B                                                 | Renal cysts and diabetes                                                           | 137920         |             | 25         |
| <i>HPSE2</i>                                             | heparanase 2                                                    | Urofacial                                                                          | 236730         |             | 26         |
| <i>ITGA3</i>                                             | integrin alpha 3                                                | nephrotic syndrome                                                                 | 614748         |             | 27         |
| <i>ITGA8</i>                                             | integrin alpha 8                                                | Kidney agenesis                                                                    | 191830         |             | 28         |
| <i>JAG1</i>                                              | jagged 1                                                        | Allagile                                                                           | 118450         |             | 29         |
| <i>KIF14</i>                                             | kinesin family member 14                                        | Multicystic renal<br>dysplasia/renal agenesis and<br>microcephaly                  | 616258         |             | 30         |
| <i>LRIG2</i>                                             | leucine-rich repeats and immunoglobulin-like domains 2          | Urofacial                                                                          | 615112         |             | 31         |
| <i>LRP4</i>                                              | low density lipoprotein receptor-related protein 4              | Cenani-Lenz                                                                        | 212780         |             | 32         |
| <i>NEK8</i>                                              | NIMA (never in mitosis gene a)-related expressed kinase 8       | Renal cystic dysplasia, situs<br>inversus, cardiopathy, bile<br>duct paucity       | 615415         |             | 33         |
| <i>NOTCH2</i>                                            | notch 2                                                         | Allagille/Hadju Cheney                                                             | 610205         |             | 34         |
| <i>PAX2</i>                                              | paired box 2                                                    | Renal coloboma                                                                     | 120330         |             | 35         |
| <i>REN</i>                                               | renin 1 structural                                              | Renal tubular dysgenesis                                                           | 179820         |             | 36         |
| <i>RET</i>                                               | ret proto-oncogene                                              | Kidney agenesis,<br>Hirschsprung                                                   | 142623         |             | 37         |
| <i>ROBO2</i>                                             | roundabout guidance receptor 2                                  | Vesico ureteral reflux                                                             | 610878         |             | 38         |
| <i>SALL1</i>                                             | sal-like 1 (Drosophila)                                         | Townes Brocks                                                                      | 107480         |             | 39         |
| <i>SALL4</i>                                             | sal-like 4 (Drosophila)                                         | Duane-radial ray                                                                   | 607323         |             | 40         |
| <i>SIX1</i>                                              | sine oculis-related homeobox 1                                  | Branchio oto renal                                                                 | 608389         |             | 41         |
| <i>SIX2</i>                                              | sine oculis-related homeobox 2                                  | Isolated CAKUT                                                                     |                |             | 6          |
| <i>SIX5</i>                                              | sine oculis-related homeobox 5                                  | Branchio oto renal                                                                 | 610896         |             | 42         |
| <i>SLIT2</i>                                             | slit homolog 2 (Drosophila)                                     | Vesico ureteral reflux                                                             |                |             | 38         |
| <i>SOX17</i>                                             | SRY (sex determining region Y)-box 17                           | isolated CAKUT                                                                     | 613674         |             | 43         |
| <i>TBC1D1</i>                                            | TBC1 domain family, member 1                                    | isolated CAKUT                                                                     |                |             | 44         |
| <i>TBX18</i>                                             | T-box18                                                         | pelvi-ureteric junction<br>obstruction                                             | 143400         |             | 45         |
| <i>TNXB</i>                                              | tenascin XB                                                     | Vesico ureteral reflux                                                             | 615963         |             | 46         |
| <i>TRAP1</i>                                             | TNF receptor-associated protein 1                               | VACTERL/isolated CAKUT                                                             |                |             | 47         |
| <i>UMOD</i>                                              | uromodulin                                                      | Hyperuricemia, Medullary<br>cystic kidney disease                                  | 162000, 603860 |             | 48         |
| <i>UPK3A</i>                                             | uroplakin 3A                                                    | Vesico ureteral reflux                                                             |                |             | 49         |
| <i>WNT4</i>                                              | wingless-type MMTV integration site family, member 4            | Hypodysplasia                                                                      |                |             | 50         |
| <b>b- Mouse models with kidney developmental defects</b> |                                                                 |                                                                                    |                |             |            |
| <i>AGTR2</i>                                             | angiotensin II receptor, type 2                                 |                                                                                    |                | MGI:87966   | 51         |
| <i>ALDH1A2</i>                                           | aldehyde dehydrogenase family 1, subfamily A2                   |                                                                                    |                | MGI:107928  | 52         |
| <i>AMER1</i>                                             | APC membrane recruitment 1                                      |                                                                                    |                | MGI:1919595 | 53         |
| <i>AQP2</i>                                              | aquaporin 2                                                     |                                                                                    |                | MGI:1096865 | 54         |

|                 |                                                                                    |          |             |     |
|-----------------|------------------------------------------------------------------------------------|----------|-------------|-----|
| <i>ATMIN</i>    | ATM interactor                                                                     |          | MGI:2682328 | 55  |
| <i>BCL2</i>     | B cell leukemia/lymphoma 2                                                         |          | MGI:88138   | 56  |
| <i>BDKRB2</i>   | bradykinin receptor, beta 2                                                        |          | MGI:102845  | 57  |
| <i>BMP7</i>     | bone morphogenetic protein 7                                                       |          | MGI:103302  | 58  |
| <i>BMPER</i>    | BMP-binding endothelial regulator                                                  |          | MGI:1920480 | 59  |
| <i>CDH6</i>     | cadherin 6                                                                         |          | MGI:107435  | 60  |
| <i>CER1</i>     | alkaline ceramidase 1                                                              |          |             | 61  |
| <i>CFL1</i>     | cofilin 1                                                                          |          |             | 62  |
| <i>CRIM1</i>    | cysteine rich transmembrane BMP regulator 1 (chordin like)                         |          | MGI:1354756 | 63  |
| <i>CTNNB1</i>   | catenin (cadherin associated protein), beta 1                                      |          | MGI:88276   | 64  |
| <i>CTNNBIP1</i> | catenin beta interacting protein 1                                                 |          | MGI:1915756 | 65  |
| <i>CXCR4</i>    | chemokine (C-X-C motif) receptor 4                                                 |          | MGI:109563  | 66  |
| <i>DACT1</i>    | dishevelled-binding antagonist of beta-catenin 1                                   |          | MGI:1891740 | 67  |
| <i>DCHS1</i>    | dachsous 1 (Drosophila)                                                            |          | MGI:2685011 | 68  |
| <i>DCN</i>      | decorin                                                                            |          | MGI:94872   | 69  |
| <i>DLG1</i>     | discs, large homolog 1 (Drosophila)                                                |          | MGI:107231  | 70  |
| <i>DLL1</i>     | delta-like 1 (Drosophila)                                                          |          | MGI:104659  | 71  |
| <i>DSTN</i>     | destrin                                                                            |          |             | 72  |
| <i>ECM1</i>     | extracellular matrix protein 1                                                     |          |             | 72  |
| <i>EGFR</i>     | epidermal growth factor receptor                                                   |          | MGI:95294   | 73  |
| <i>EMX2</i>     | empty spiracles homeobox 2                                                         |          | MGI:95388   | 74  |
| <i>EPHA4</i>    | Eph receptor A4                                                                    |          |             | 75  |
| <i>EPHA7</i>    | Eph receptor A7                                                                    |          |             | 75  |
| <i>ETV4</i>     | ets variant 4                                                                      |          | MGI:99423   | 76  |
| <i>ETV5</i>     | ets variant 5                                                                      |          | MGI:1096867 | 76  |
| <i>EXOC5</i>    | exocyst complex component 5                                                        |          | MGI:2145645 | 77  |
| <i>FAT1</i>     | FAT atypical cadherin 1                                                            |          | MGI:109168  | 78  |
| <i>FAT4</i>     | FAT atypical cadherin 4                                                            |          | MGI:3045256 | 79  |
| <i>FGF10</i>    | fibroblast growth factor 10                                                        |          | MGI:1099809 | 80  |
| <i>FGF7</i>     | fibroblast growth factor 7                                                         |          | MGI:95521   | 81  |
| <i>FGF8</i>     | fibroblast growth factor 8                                                         |          | MGI:99604   | 82  |
| <i>FGF9</i>     | fibroblast growth factor 9                                                         |          |             | 17  |
| <i>FGFR1</i>    | fibroblast growth factor receptor 1                                                | Kallmann | 147950      | 83  |
| <i>FGFR2</i>    | fibroblast growth factor receptor 2                                                |          | MGI:95523   | 83  |
| <i>FGFRL1</i>   | fibroblast growth factor receptor-like 1                                           |          | MGI:2150920 | 84  |
| <i>FMN1</i>     | formin 1                                                                           |          | MGI:101815  | 85  |
| <i>FOXC1</i>    | forkhead box C1                                                                    |          | MGI:1347466 | 86  |
| <i>FOXC2</i>    | forkhead box C2                                                                    |          | MGI:1347481 | 86  |
| <i>FOXD1</i>    | forkhead box D1                                                                    |          | MGI:1347463 | 87  |
| <i>FSTL1</i>    | follistatin-like 1                                                                 |          | MGI:102793  | 88  |
| <i>GATA2</i>    | GATA binding protein 2                                                             |          | MGI:95662   | 89  |
| <i>GDF11</i>    | growth differentiation factor 11                                                   |          | MGI:1338027 | 90  |
| <i>GDNF</i>     | glial cell line derived neurotrophic factor                                        |          | MGI:107430  | 91  |
| <i>GFRA1</i>    | glial cell line derived neurotrophic factor family receptor alpha 1                |          | MGI:1100842 | 92  |
| <i>GLCE</i>     | glucuronyl C5-epimerase                                                            |          | MGI:2136405 | 93  |
| <i>GREM1</i>    | gremlin 1, DAN family BMP antagonist                                               |          | MGI:1344337 | 94  |
| <i>GRHL2</i>    | grainyhead-like 2 (Drosophila)                                                     |          |             | 95  |
| <i>HOXA11</i>   | homeobox A10                                                                       |          |             | 96  |
| <i>HOXD11</i>   | homeobox D11                                                                       |          |             | 96  |
| <i>HS2ST1</i>   | heparan sulfate 2-O-sulfotransferase 1                                             |          | MGI:1346049 | 97  |
| <i>ILK</i>      | integrin linked kinase                                                             |          | MGI:1195267 | 98  |
| <i>ISL1</i>     | ISL1 transcription factor, LIM/homeodomain                                         |          |             | 99  |
| <i>ITGB1</i>    | integrin beta 1 (fibronectin receptor beta)                                        |          | MGI:96610   | 100 |
| <i>KIF26B</i>   | kinesin family member 26B                                                          |          | MGI:2447076 | 101 |
| <i>KIF3A</i>    | kinesin family member 3A                                                           |          | MGI:107689  | 102 |
| <i>KISS1R</i>   | KISS1 receptor                                                                     |          | MGI:2148793 | 103 |
| <i>LAMA5</i>    | laminin, alpha 5                                                                   |          | MGI:105382  | 104 |
| <i>LAMC1</i>    | laminin, gamma 1                                                                   |          | MGI:99914   | 105 |
| <i>LGR4</i>     | leucine-rich repeat-containing G protein-coupled receptor 4                        |          | MGI:1891468 | 106 |
| <i>LHX1</i>     | LIM homeobox protein 1                                                             |          | MGI:99783   | 107 |
| <i>LZTS2</i>    | leucine zipper, putative tumor suppressor 2                                        |          | MGI:2385095 | 108 |
| <i>MMP9</i>     | matrix metalloproteinase 9                                                         |          |             | 109 |
| <i>MYCN</i>     | v-myc avian myelocytomatosis viral related oncogene, neuroblastoma derived         |          | MGI:97357   | 110 |
| <i>NFIA</i>     | nuclear factor I/A                                                                 |          | MGI:108056  | 111 |
| <i>NPNT</i>     | nephronectin                                                                       |          | MGI:2148811 | 112 |
| <i>NR2F2</i>    | nuclear receptor subfamily 2, group F, member 2                                    |          |             | 113 |
| <i>OSR1</i>     | odd-skipped related 1 (Drosophila)                                                 |          | MGI:1344424 | 114 |
| <i>PARVA</i>    | parvin, alpha                                                                      |          | MGI:1931144 | 115 |
| <i>PAX8</i>     | paired box 8                                                                       |          |             | 116 |
| <i>PBX1</i>     | pre B cell leukemia homeobox 1                                                     |          | MGI:97495   | 117 |
| <i>POU3F3</i>   | POU domain, class 3, transcription factor 3                                        |          | MGI:102564  | 118 |
| <i>PPP3R1</i>   | protein phosphatase 3, regulatory subunit B, alpha isoform (calcineurin B, type I) |          | MGI:107172  | 119 |
| <i>PTCH1</i>    | patched 1                                                                          |          | MGI:105373  | 120 |
| <i>PTGS2</i>    | prostaglandin-endoperoxide synthase 2                                              |          | MGI:97798   | 121 |
| <i>RARA</i>     | retinoic acid receptor, alpha                                                      |          |             | 122 |

|                |                                                                                        |                      |               |            |     |
|----------------|----------------------------------------------------------------------------------------|----------------------|---------------|------------|-----|
| <i>RARB</i>    | retinoic acid receptor, beta                                                           |                      |               | 122        |     |
| <i>RBPJ</i>    | recombination signal binding protein for immunoglobulin kappa J region                 |                      | MGI:96522     | 123        |     |
| <i>RERE</i>    | arginine glutamic acid dipeptide (RE) repeats                                          |                      | MGI:2683486   | 124        |     |
| <i>ROBO1</i>   | roundabout guidance receptor 1                                                         |                      | MGI:1274781   | 66         |     |
| <i>SEMA3A</i>  | sema domain, immunoglobulin domain (Ig), short basic domain, secreted, (semaphorin) 3A | Kallmann             | 614897        | MGI:107558 | 125 |
| <i>SHH</i>     | sonic hedgehog                                                                         |                      | MGI:98297     | 126        |     |
| <i>SMAD4</i>   | SMAD family member 4                                                                   |                      | MGI:894293    | 127        |     |
| <i>SOX11</i>   | SRY (sex determining region Y)-box 11                                                  |                      |               | 128        |     |
| <i>SOX12</i>   | SRY (sex determining region Y)-box 12                                                  |                      |               | 129        |     |
| <i>SOX4</i>    | SRY (sex determining region Y)-box 4                                                   |                      |               | 129        |     |
| <i>SOX8</i>    | SRY (sex determining region Y)-box 8                                                   |                      |               | 130        |     |
| <i>SOX9</i>    | SRY (sex determining region Y)-box 9                                                   |                      | MGI:98371     | 130        |     |
| <i>SPRY1</i>   | sprouty homolog 1 (Drosophila)                                                         |                      | MGI:1345139   | 131        |     |
| <i>TCF21</i>   | transcription factor 21                                                                |                      | MGI:1202715   | 132        |     |
| <i>TFCP2L1</i> | transcription factor CP2-like 1                                                        |                      | MGI:2444691   | 133        |     |
| <i>TGFB2</i>   | transforming growth factor, beta 2                                                     |                      | MGI:98726     | 134        |     |
| <i>TGFB3</i>   | transforming growth factor, beta receptor III                                          |                      |               | 135        |     |
| <i>TRPS1</i>   | trichorhinophalangeal syndrome I (human)                                               |                      | MGI:1927616   | 136        |     |
| <i>TSHZ3</i>   | teashirt zinc finger family member 3                                                   |                      | MGI:2442819   | 137        |     |
| <i>WNT11</i>   | wingless-type MMTV integration site family, member 11                                  |                      | MGI:101948    | 138        |     |
| <i>WNT5A</i>   | wingless-type MMTV integration site family, member 5A                                  |                      | MGI:98958     | 66         |     |
| <i>WNT7B</i>   | wingless-type MMTV integration site family, member 7B                                  |                      | MGI:98962     | 139        |     |
| <i>WNT9B</i>   | wingless-type MMTV integration site family, member 9B                                  |                      | MGI:1197020   | 140        |     |
| <i>WT1</i>     | Wilms tumor 1 homolog                                                                  | Denys Drash syndrome | 194080/256370 | 141        |     |
| <i>YAP1</i>    | yes-associated protein 1                                                               |                      | MGI:103262    | 142        |     |

**c- Relevant functional data (cellular and/or non-mouse models)**

|                |                                                                                 |  |  |             |
|----------------|---------------------------------------------------------------------------------|--|--|-------------|
| <i>ALCAM</i>   | activated leukocyte cell adhesion molecule                                      |  |  | 143         |
| <i>ALX1</i>    | ALX homeobox 1                                                                  |  |  | 144         |
| <i>AMOT</i>    | angiominin                                                                      |  |  | 145         |
| <i>AMOTL1</i>  | angiominin-like 1                                                               |  |  | 145         |
| <i>AMOTL2</i>  | angiominin-like 2                                                               |  |  | 145         |
| <i>ATF2</i>    | glial cell line derived neurotrophic factor                                     |  |  | 143         |
| <i>BCL2L11</i> | BCL2-like 11 (apoptosis facilitator)                                            |  |  | 146         |
| <i>CD151</i>   | CD151 antigen                                                                   |  |  | 147         |
| <i>CDKN1C</i>  | cyclin-dependent kinase inhibitor 1C (P57)                                      |  |  | 148         |
| <i>CITED1</i>  | Cbp/p300-interacting transactivator with Glu/Asp-rich carboxy-terminal domain 1 |  |  | 149         |
| <i>CRLF1</i>   | cytokine receptor-like factor 1                                                 |  |  | 150         |
| <i>DCHS2</i>   | dachsous 2 (Drosophila)                                                         |  |  | 151         |
| <i>DKK1</i>    | dickkopf WNT signaling pathway inhibitor 1                                      |  |  | 64          |
| <i>ELF5</i>    | E74-like factor 5                                                               |  |  | 152         |
| <i>ESRP1</i>   | epithelial splicing regulatory protein 1                                        |  |  | unpublished |
| <i>ESRP2</i>   | epithelial splicing regulatory protein 2                                        |  |  | unpublished |
| <i>FIX1</i>    | four jointed box 1 (Drosophila)                                                 |  |  | 79          |
| <i>FRS2</i>    | fibroblast growth factor receptor substrate 2                                   |  |  | 153         |
| <i>FRY</i>     | FRY microtubule binding protein                                                 |  |  | unpublished |
| <i>FZD3</i>    | frizzled class receptor 9                                                       |  |  | 143         |
| <i>FZD4</i>    | frizzled class receptor 4                                                       |  |  | 154         |
| <i>FZD7</i>    | frizzled class receptor 7                                                       |  |  | 155         |
| <i>FZD8</i>    | frizzled class receptor 8                                                       |  |  | 154         |
| <i>GLI1</i>    | GLI-Kruppel family member GLI1                                                  |  |  | 156         |
| <i>GNB3</i>    | guanine nucleotide binding protein (G protein), beta 3                          |  |  | 49          |
| <i>GPC1</i>    | glypican 1                                                                      |  |  | 157         |
| <i>HAS3</i>    | hyaluronan synthase 3                                                           |  |  | 158         |
| <i>HCN3</i>    | hyperpolarization-activated, cyclic nucleotide-gated K+ 3                       |  |  | 159         |
| <i>HGF</i>     | interleukin 6                                                                   |  |  | 160         |
| <i>HOXB5</i>   | homeobox B5                                                                     |  |  | 161         |
| <i>HOXB6</i>   | homeobox B6                                                                     |  |  | 161         |
| <i>HOXC11</i>  | homeobox C11                                                                    |  |  | 96          |
| <i>HOXD10</i>  | homeobox D10                                                                    |  |  | 162         |
| <i>HOXD3</i>   | homeobox D3                                                                     |  |  | 161         |
| <i>HOXD8</i>   | homeobox D8                                                                     |  |  | 161         |
| <i>HOXD9</i>   | homeobox D9                                                                     |  |  | 161         |
| <i>IRX3</i>    | Iroquois related homeobox 3                                                     |  |  | 163         |
| <i>KDR</i>     | kinase insert domain protein receptor                                           |  |  | 164         |
| <i>KEAP1</i>   | kelch-like ECH-associated protein 1                                             |  |  | unpublished |
| <i>KIT</i>     | kit oncogene                                                                    |  |  | 165         |
| <i>LATS1</i>   | large tumor suppressor                                                          |  |  | 166         |
| <i>LLGL1</i>   | lethal giant larvae homolog 1 (Drosophila)                                      |  |  | 167         |
| <i>MAGED1</i>  | melanoma antigen, family D, 1                                                   |  |  | 168         |
| <i>MDM2</i>    | transformed mouse 3T3 cell double minute 2                                      |  |  | 169         |
| <i>MDM4</i>    | transformed mouse 3T3 cell double minute 4                                      |  |  | unpublished |
| <i>MECOM</i>   | MDS1 and EVI1 complex locus                                                     |  |  | 170         |
| <i>MEOX2</i>   | mesenchyme homeobox 2                                                           |  |  | 171         |

|               |                                                                  |               |        |             |
|---------------|------------------------------------------------------------------|---------------|--------|-------------|
| <i>MET</i>    | met proto-oncogene                                               |               |        | 172         |
| <i>MMP13</i>  | matrix metalloproteinase 13                                      |               |        | 173         |
| <i>NCAM1</i>  | neural cell adhesion molecule 1                                  |               |        | 174         |
| <i>NF2</i>    | neurofibromatosis 2                                              |               |        | 175         |
| <i>NKX2-1</i> | NK2 homeobox 1                                                   |               |        | 176         |
| <i>NR2F1</i>  | nuclear receptor subfamily 2, group F, member 2                  |               |        | 177         |
| <i>NR4A2</i>  | nuclear receptor subfamily 4, group A, member 2                  |               |        | 178         |
| <i>OSR2</i>   | odd-skipped related 2                                            |               |        | 179         |
| <i>PAXIP1</i> | PAX interacting (with transcription-activation domain) protein 1 |               |        | 180         |
| <i>Pik3c3</i> | phosphoinositide-3-kinase, class 3                               |               |        | unpublished |
| <i>PLAC8</i>  | placenta-specific 8                                              |               |        | 181         |
| <i>PPM1B</i>  | protein phosphatase 1B, magnesium dependent, beta isoform        |               |        | 182         |
| <i>PRKX</i>   | protein kinase, X-linked                                         |               |        | 183         |
| <i>PTPN11</i> | protein tyrosine phosphatase, non-receptor type 11               |               |        | 184         |
| <i>RARG</i>   | retinoic acid receptor, gamma                                    |               |        | 122         |
| <i>RSPO3</i>  | R-spondin 3                                                      |               |        | 185         |
| <i>RXRA</i>   | retinoid X receptor alpha                                        |               |        | 177         |
| <i>SCRIB</i>  | scribbled planar cell polarity                                   |               |        | 186         |
| <i>SH2B1</i>  | SH2B adaptor protein 1                                           |               |        | 187         |
| <i>SHOX2</i>  | short stature homeobox 2                                         |               |        | 188         |
| <i>SIM1</i>   | single-minded homolog 1 (Drosophila)                             |               |        | 189         |
| <i>SMO</i>    | smoothened, frizzled class receptor                              |               |        | 190         |
| <i>SNAI1</i>  | snail family zinc finger 1                                       |               |        | 191         |
| <i>SOST</i>   | sclerostin                                                       |               |        | 192         |
| <i>SPRY2</i>  | sprouty homolog 2 (Drosophila)                                   |               |        | 193         |
| <i>SULF1</i>  | sulfatase 1                                                      |               |        | 194         |
| <i>SULF2</i>  | sulfatase 2                                                      |               |        | 194         |
| <i>TAZ</i>    | WW domain containing transcription regulator 1                   |               |        | 178         |
| <i>TBX1</i>   | T-box 1                                                          |               |        | 162         |
| <i>TBX3</i>   | T-box 3                                                          | Ulnar mammary | 181450 | 195         |
| <i>TIMP1</i>  | tissue inhibitor of metalloproteinase 1                          |               |        | 173         |
| <i>TJP2</i>   | tight junction protein 2                                         |               |        | 196         |
| <i>USF2</i>   | upstream transcription factor 2                                  |               |        | 14          |
| <i>VEGFA</i>  | vascular endothelial growth factor A                             |               |        | 197         |
| <i>VSNL1</i>  | visinin-like 1                                                   |               |        | 198         |
| <i>WNT5B</i>  | wingless-type MMTV integration site family, member 5B            |               |        | 199         |
| <i>ZEB2</i>   | zinc finger E-box binding homeobox 2                             |               |        | 200         |

**d- Role in ureter/bladder development**

|                |                                                                                                |  |             |     |
|----------------|------------------------------------------------------------------------------------------------|--|-------------|-----|
| <i>ADAMTS1</i> | a disintegrin-like and metalloproteinase (reprolysin type) with thrombospondin type 1 motif, 1 |  | MGI:109249  | 201 |
| <i>AHR</i>     | aryl-hydrocarbon receptor                                                                      |  | MGI:105043  | 202 |
| <i>BMP5</i>    | bone morphogenetic protein 5                                                                   |  | MGI:88181   | 202 |
| <i>BMPR1A</i>  | bone morphogenetic protein receptor, type 1A                                                   |  |             | 202 |
| <i>BMPR1B</i>  | bone morphogenetic protein receptor, type 1B                                                   |  |             | 202 |
| <i>BMPR2</i>   | bone morphogenetic protein receptor, type II (serine/threonine kinase)                         |  | MGI:1095407 | 202 |
| <i>HOXD13</i>  | homeobox D13                                                                                   |  |             | 202 |
| <i>ID2</i>     | inhibitor of DNA binding 2                                                                     |  | MGI:96397   | 202 |
| <i>KLF5</i>    | Kruppel-like factor 5                                                                          |  |             | 203 |
| <i>MYOCD</i>   | myocardin                                                                                      |  |             | 202 |
| <i>SCARB2</i>  | scavenger receptor class B, member 2                                                           |  | MGI:1196458 | 202 |

**e- Potential targets of WT1 or HNF1B**

|                |                                                                     |  |  |     |
|----------------|---------------------------------------------------------------------|--|--|-----|
| <i>ACTN3</i>   | actinin alpha 3                                                     |  |  | 204 |
| <i>ADCY8</i>   | adenylate cyclase 8                                                 |  |  | 204 |
| <i>Aip</i>     | aryl-hydrocarbon receptor-interacting protein                       |  |  | 204 |
| <i>ASIC4</i>   | acid-sensing (proton-gated) ion channel family member 4             |  |  | 204 |
| <i>C1QTNF3</i> | C1q and tumor necrosis factor related protein 3                     |  |  | 204 |
| <i>CALCR</i>   | calcitonin receptor                                                 |  |  | 204 |
| <i>CEBPA</i>   | CCAAT/enhancer binding protein (C/EBP), alpha                       |  |  | 204 |
| <i>CHST9</i>   | carbohydrate (N-acetylgalactosamine 4-O) sulfotransferase 9         |  |  | 204 |
| <i>CRYM</i>    | crystallin, mu                                                      |  |  | 204 |
| <i>DEAF1</i>   | asparagine-linked glycosylation 10B (alpha-1,2-glycosyltransferase) |  |  | 204 |
| <i>DES</i>     | desmin                                                              |  |  | 204 |
| <i>DUSP6</i>   | dual specificity phosphatase 6                                      |  |  | 204 |
| <i>EGR1</i>    | early growth response 1                                             |  |  | 204 |
| <i>ENC1</i>    | ectodermal-neural cortex 1                                          |  |  | 204 |
| <i>FGF14</i>   | fibroblast growth factor 14                                         |  |  | 204 |
| <i>FGF16</i>   | fibroblast growth factor 16                                         |  |  | 204 |
| <i>FGF18</i>   | fibroblast growth factor 18                                         |  |  | 204 |
| <i>FST</i>     | folliculin                                                          |  |  | 204 |
| <i>GAS1</i>    | growth arrest specific 1                                            |  |  | 205 |
| <i>GBX2</i>    | gastrulation brain homeobox 2                                       |  |  | 204 |
| <i>GPR173</i>  | G-protein coupled receptor 173                                      |  |  | 204 |
| <i>GPX6</i>    | glutathione peroxidase 7                                            |  |  | 204 |

|                |                                                                       |     |
|----------------|-----------------------------------------------------------------------|-----|
| <i>HIC1</i>    | hypermethylated in cancer 1                                           | 204 |
| <i>HOXA3</i>   | homeobox A3                                                           | 204 |
| <i>HOXB1</i>   | homeobox B1                                                           | 204 |
| <i>HOXB3</i>   | homeobox B3                                                           | 204 |
| <i>HS3ST6</i>  | heparan sulfate (glucosamine) 3-O-sulfotransferase 6                  | 204 |
| <i>IRX1</i>    | Iroquois related homeobox 1 (Drosophila)                              | 206 |
| <i>IRX2</i>    | Iroquois related homeobox 2 (Drosophila)                              | 206 |
| <i>KRT23</i>   | keratin 23                                                            | 204 |
| <i>LRFN2</i>   | leucine rich repeat and fibronectin type III domain containing 2      | 204 |
| <i>MATN4</i>   | matrilin 2                                                            | 204 |
| <i>Mybph</i>   | myosin binding protein H                                              | 204 |
| <i>NRXN3</i>   | neurexin III                                                          | 204 |
| <i>NTN1</i>    | netrin 1                                                              | 204 |
| <i>PDE3B</i>   | phosphodiesterase 3B, cGMP-inhibited                                  | 204 |
| <i>PHF19</i>   | PHD finger protein 19                                                 | 204 |
| <i>PPP1R1B</i> | protein phosphatase 1, regulatory (inhibitor) subunit 1B              | 204 |
| <i>PTGIR</i>   | prostaglandin I receptor (IP)                                         | 204 |
| <i>RAI2</i>    | retinoic acid induced 2                                               | 204 |
| <i>RCSL1</i>   | RCSL domain containing 1                                              | 204 |
| <i>REM1</i>    | rad and gem related GTP binding protein 1                             | 204 |
| <i>RORA</i>    | RAR-related orphan receptor alpha                                     | 204 |
| <i>RSPO1</i>   | R-spondin 1                                                           | 204 |
| <i>SLC16A6</i> | solute carrier family 16 (monocarboxylic acid transporters), member 6 | 204 |
| <i>SLC6A18</i> | solute carrier family 6 (neurotransmitter transporter), member 18     | 204 |
| <i>SNAP91</i>  | synaptosomal-associated protein 91                                    | 204 |
| <i>SPACA4</i>  | sperm acrosome associated 4                                           | 204 |
| <i>SPOCK2</i>  | sparc/osteonectin, cwcv and kazal-like domains proteoglycan 2         | 204 |
| <i>STMN4</i>   | stathmin-like 4                                                       | 204 |
| <i>SYPL2</i>   | synaptophysin-like 2                                                  | 204 |
| <i>TGM5</i>    | transglutaminase 5                                                    | 204 |
| <i>TNNT2</i>   | troponin T2, cardiac                                                  | 204 |
| <i>TRAF1</i>   | TNF receptor-associated factor 1                                      | 204 |
| <i>UNCX</i>    | UNC homeobox                                                          | 204 |
| <i>WNT8B</i>   | wingless-type MMTV integration site family, member 8B                 | 204 |
| <i>ZNF106</i>  | zinc finger protein 106                                               | 204 |

**f- gene related to gene(s) in group (a) to (e), expressed during kidney/LUT development**

|                |                                                       |
|----------------|-------------------------------------------------------|
| <i>ALDH1A3</i> | aldehyde dehydrogenase family 1, subfamily A3         |
| <i>BMP2</i>    | bone morphogenetic protein 2                          |
| <i>BMP6</i>    | bone morphogenetic protein 6                          |
| <i>FAT3</i>    | FAT atypical cadherin 3                               |
| <i>FGF1</i>    | fibroblast growth factor 1                            |
| <i>FGF2</i>    | fibroblast growth factor 13                           |
| <i>GRIP2</i>   | glutamate receptor interacting protein 2              |
| <i>HNF1A</i>   | HNF1 homeobox A                                       |
| <i>HNF4A</i>   | hepatic nuclear factor 4, alpha                       |
| <i>HPSE</i>    | heparanase                                            |
| <i>HS6ST1</i>  | heparan sulfate 6-O-sulfotransferase 1                |
| <i>SIX4</i>    | sine oculis-related homeobox 4                        |
| <i>TBX2</i>    | T-box 2                                               |
| <i>UPK1A</i>   | uroplakin 1A                                          |
| <i>UPK1B</i>   | uroplakin 1B                                          |
| <i>UPK2</i>    | uroplakin 2                                           |
| <i>UPK3B</i>   | uroplakin 3B                                          |
| <i>WNT2B</i>   | wingless-type MMTV integration site family, member 2B |
| <i>WNT6</i>    | wingless-type MMTV integration site family, member 6  |



**Table S3. List of the 120 variants of unknown significance identified in candidate genes in CAKUT cases, that are absent in ExAC and our in-house database**

| Gene          | Ref seq      | Nucleotide change | Protein change   | Number of damaging scores for missense variants <sup>a</sup> |
|---------------|--------------|-------------------|------------------|--------------------------------------------------------------|
| <i>ADCY8</i>  | NM_0011115   | c.2603T>G         | p.Ile868Ser      | 4/5                                                          |
| <i>AMOT</i>   | NM_001113490 | c.1601G>A         | p.Arg534Lys      | 3/5                                                          |
| <i>AMOTL1</i> | NM_130847    | c.1519G>A         | p.Glu507Lys      | 5/5                                                          |
| <i>AMOTL1</i> | NM_130847    | c.1258C>T         | p.Pro420Ser      | 3/5                                                          |
| <i>BMPR1A</i> | NM_004329    | c.1189C>T         | p.Phe397Ser      | 5/5                                                          |
| <i>CDKN1C</i> | NM_000076    | c.17T>C           | p.Leu6Pro        | 3/5                                                          |
| <i>CITED1</i> | NM_001144885 | c.16C>T           | p.Gln6*          |                                                              |
| <i>CRIM1</i>  | NM_016441    | c.1901G>A         | p.Gly634Glu      | 5/5                                                          |
| <i>CRLF1</i>  | NM_004750    | c.853A>G          | p.Lys285Glu      | 3/5                                                          |
| <i>CRLF1</i>  | NM_004750    | c.431G>A          | p.Trp144*        |                                                              |
| <i>DACT1</i>  | NM_016651    | c.169G>A          | p.Glu57Lys       | 5/5                                                          |
| <i>DCHS1</i>  | NM_003737    | c.6647C>T         | p.Ala2216Val     | 3/5                                                          |
| <i>DCHS1</i>  | NM_003737    | c.5140C>T         | p.Gln1714*       |                                                              |
| <i>DCHS1</i>  | NM_003737    | c.2789C>G         | p.Thr930Ser      | 4/5                                                          |
| <i>DCHS1</i>  | NM_003737    | c.868G>T,         | p.Val290Leu      | 4/5                                                          |
| <i>DEAF1</i>  | NM_021008    | c.694dup          | p.Glu232Glyfs*10 |                                                              |
| <i>ECM1</i>   | NM_004425    | c.527A>T          | p.Asn176Ile      | 4/5                                                          |
| <i>EGFR</i>   | NM_005228    | c.1717G>A         | p.Gly573Arg      | 5/5                                                          |
| <i>ENC1</i>   | NM_003633    | c.658T>C          | p.Tyr220His      | 4/5                                                          |
| <i>ETV4</i>   | NM_001986    | c.626A>G          | p.Tyr209Cys      | 5/5                                                          |
| <i>FAT1</i>   | NM_005245    | c.5759A>C         | p.Glu1920Ala     | 4/5                                                          |
| <i>FAT1</i>   | NM_005245    | c.6367C>T         | p.His2123Tyr     | 5/5                                                          |
| <i>FAT3</i>   | NM_001008781 | c.1729C>G         | p.Leu577Val      | 3/5                                                          |
| <i>FAT3</i>   | NM_001008781 | c.9814A>T         | p.Thr3272Ser     | 3/5                                                          |
| <i>FAT3</i>   | NM_001008781 | c.3724G>C         | p.Val1242Leu     | 3/5                                                          |
| <i>FAT4</i>   | NM_001291303 | c.6533C>T         | p.Ala2178Val     | 4/4                                                          |
| <i>FAT4</i>   | NM_001291303 | c.5410A>G         | p.Arg1804Gly     | 4/4                                                          |
| <i>FAT4</i>   | NM_001291303 | c.11584G>C        | p.Glu3862Gln     | 4/4                                                          |
| <i>FAT4</i>   | NM_001291303 | c.14201A>G        | p.Glu4734Gly     | 4/5                                                          |
| <i>FGF8</i>   | NM_033163    | c.362C>G          | p.Thr121Ser      | 3/5                                                          |
| <i>FGFR1</i>  | NM_001174067 | c.271C>T          | p.Arg91Trp       | 4/5                                                          |
| <i>FOXC1</i>  | NM_001453    | c.1016C>T         | p.Ser339Phe      | 3/5                                                          |
| <i>FOXC2</i>  | NM_005251    | c.610C>T          | p.Pro204Ser      | 3/5                                                          |
| <i>FRY</i>    | NM_023037    | c.4928C>T         | p.Ala1643Val     | 3/5                                                          |
| <i>FRY</i>    | NM_023037    | c.7097C>T         | p.Thr2366Ile     | 4/5                                                          |
| <i>FZD4</i>   | NM_012193    | c.1327C>A         | p.Leu443Met      | 3/5                                                          |
| <i>FZD7</i>   | NM_003507    | c.650C>T          | p.Pro217Leu      | 4/5                                                          |
| <i>FZD8</i>   | NM_031866    | c.314C>G          | p.Pro105Arg      | 3/5                                                          |
| <i>GAS1</i>   | NM_002048    | c.644dup          | p.Ala216Glyfs*52 |                                                              |
| <i>GBX2</i>   | NM_001485    | c.151C>G          | p.Arg51Gly       | 4/5                                                          |
| <i>GBX2</i>   | NM_001485    | c.185C>T          | p.Pro62Leu       | 3/5                                                          |
| <i>GLI1</i>   | NM_005269    | c.968G>A          | p.Arg323Gln      | 4/5                                                          |
| <i>GLI1</i>   | NM_005269    | c.3239C>T         | p.Pro1080Leu     | 4/5                                                          |

|               |              |                  |                   |     |
|---------------|--------------|------------------|-------------------|-----|
| <i>GNB3</i>   | NM_002075    | c.827T>G         | p.Val276Gly       | 4/5 |
| <i>GPR173</i> | NM_018969    | c.428T>C         | p.Val143Ala       | 4/5 |
| <i>GREM1</i>  | NM_013372    | c.24-25insTGTA   | p.Gly9Cysfs*16    |     |
| <i>GRHL2</i>  | NM_024915    | c.1156G>A        | p.Gly386Arg       | 5/5 |
| <i>GRHL2</i>  | NM_024915    | c.1255A>G        | p.Lys419Glu       | 5/5 |
| <i>HCN3</i>   | NM_020897    | c.2053C>T        | p.Arg685Trp       | 4/5 |
| <i>HIC1</i>   | NM_006497    | c.1099G>C        | p.Gly386Arg       | 3/5 |
| <i>HIC1</i>   | NM_006497    | c.2105G>A        | p.Gly702Asp       | 4/5 |
| <i>HIC1</i>   | NM_006497    | c.688C>T         | p.Pro230Ser       | 3/5 |
| <i>HNF1A</i>  | NM_001306179 | c.955G>A         | p.Gly319Ser       | 3/4 |
| <i>HOXA11</i> | NM_005523    | c.881T>C         | p.Met294Thr       | 3/5 |
| <i>HOXB1</i>  | NM_002144    | c.881C>T         | p.Ala294Val       | 4/5 |
| <i>HOXB5</i>  | NM_002147    | c.542G>C         | p.Arg181Trp       | 5/5 |
| <i>HOXC11</i> | NM_014212    | c.185C>G         | p.Pro62Arg        | 4/5 |
| <i>HOXD11</i> | NM_021192    | c.259G>C         | p.Gly87Arg        | 3/5 |
| <i>HOXD13</i> | NM_000523    | c.241G>T         | p.Glu81*          |     |
| <i>HPSE</i>   | NM_006665    | c.2T>C           | p.Met1?           |     |
| <i>HS6ST1</i> | NM_004807    | c.252G>T         | p.Lys84Asn        | 3/5 |
| <i>IRX2</i>   | NM_033267    | c.1193T>C        | p.Leu398Ser       | 3/5 |
| <i>KIF26B</i> | NM_018012    | c.5788C>G        | p.Arg1930Gly      | 4/5 |
| <i>KIF3A</i>  | NM_007054    | c.1135G>A        | p.Glu379Lys       | 3/5 |
| <i>KISS1R</i> | NM_032551    | c.403G>T         | p.Ala135Ser       | 5/5 |
| <i>LAMA5</i>  | NM_005560    | c.9200del        | p.Gly3067Alafs*40 |     |
| <i>LAMA5</i>  | NM_005560    | c.5789T>C        | p.Leu1930Pro      | 3/5 |
| <i>LAMA5</i>  | NM_005560    | c.3245C>T        | p.Pro1082Leu      | 4/5 |
| <i>LAMC1</i>  | NM_002293    | c.1427+1G>C      | c.1427+1G>C       |     |
| <i>LAMC1</i>  | NM_002293    | c.3850-1G>A      | c.3850-1G>A       |     |
| <i>LGR4</i>   | NM_018490    | c.2590_2591insAA | p.Phe864*         |     |
| <i>LHX1</i>   | NM_005568    | c.688A>C         | p.Asn230His       | 4/4 |
| <i>LHX1</i>   | NM_005568    | c.269C>T         | p.Thr90Ile        | 4/4 |
| <i>MAGED1</i> | NM_001005333 | c.2213C>T        | p.Ala738Val       | 4/5 |
| <i>MATN4</i>  | NM_003833    | c.131G>A         | p.Ser44Asn        | 3/5 |
| <i>MDM4</i>   | NM_002393    | c.1192G>A        | p.Ala398Thr       | 3/5 |
| <i>MECOM</i>  | NM_001105077 | c.932C>T         | p.Ala311Val       | 3/5 |
| <i>MET</i>    | NM_001127500 | c.356C>T         | p.Ala119Val       | 5/5 |
| <i>MMP9</i>   | NM_004994    | c.798delC        | p.Arg267Glyfs*71  |     |
| <i>MMP9</i>   | NM_004994    | c.964C>T         | p.Arg322Trp       | 3/5 |
| <i>MMP9</i>   | NM_004994    | c.1814del        | p.Gly605Alafs*9   |     |
| <i>MMP9</i>   | NM_004994    | c.1004C>A        | p.Ser335*         |     |
| <i>MYOCD</i>  | NM_001146312 | c.722A>G         | p.Lys241Arg       | 3/5 |
| <i>MYOCD</i>  | NM_001146312 | c.1304C>T        | p.Ser435Phe       | 4/5 |
| <i>NPNT</i>   | NM_001184690 | c.1450C>T        | p.Arg484Cys       | 4/5 |
| <i>NR2F2</i>  | NM_021005    | c.130G>A         | p.Gly44Ser        | 3/5 |
| <i>NTN1</i>   | NM_004822    | c.1814A>G        | p.605Trpext*84    |     |
| <i>PAXIP1</i> | NM_007349    | c.1074T>G        | p.His358Gln       | 3/5 |
| <i>PDE3B</i>  | NM_000922    | c.275_194del     | p.Leu92Argfs*241  |     |
| <i>PIK3C3</i> | NM_002647    | c.1790C>A        | p.Phe597His       | 4/4 |
| <i>PTGIR</i>  | NM_000960    | c.48del          | p.Pro17Argfs*6    |     |
| <i>RAI2</i>   | NM_001172739 | c.506T>C         | p.Leu169Pro       | 4/5 |

|                |              |              |                   |     |
|----------------|--------------|--------------|-------------------|-----|
| <i>RARG</i>    | NM_000966    | c.245C>T     | p.Pro82Leu        | 4/5 |
| <i>RCS1</i>    | NM_052862    | c.500G>A     | p.Arg167Lys       | 4/5 |
| <i>ROBO1</i>   | NM_002941    | c.4241C>A    | p.Ala1414Asp      | 3/5 |
| <i>RSPO3</i>   | NM_032784    | c.481A>C     | p.Lys161Gln       | 3/5 |
| <i>SCRIB</i>   | NM_182706    | c.4547C>T    | p.Ala1516Val      | 5/5 |
| <i>SCRIB</i>   | NM_182706    | c.1186C>T    | p.Leu396Phe       | 3/5 |
| <i>SCRIB</i>   | NM_182706    | c.352T>C     | p.Ser118Pro       | 3/5 |
| <i>SEMA3A</i>  | NM_006080    | c.401C>T     | p.Thr134Met       | 4/5 |
| <i>SHH</i>     | NM_000193    | c.1097T>C    | p.Val366Ala       | 3/5 |
| <i>SLC6A18</i> | NM_182632    | c.661A>T     | p.Thr221Ser       | 3/5 |
| <i>SOX4</i>    | NM_003107    | c.1001C>A    | p.Phe334His       | 3/5 |
| <i>SOX4</i>    | NM_003107    | c.406T>G     | p.Ser136Ala       | 3/5 |
| <i>SPOCK2</i>  | NM_014767    | c.1114G>T    | p.Gly372Trp       | 4/5 |
| <i>SPOCK2</i>  | NM_014767    | c.620T>G     | p.Leu207Arg       | 4/5 |
| <i>SPOCK2</i>  | NM_014767    | c.1192A>G    | p.Lys398Glu       | 4/5 |
| <i>SULF2</i>   | NM_018837    | c.1967G>T    | p.Arg656Leu       | 4/5 |
| <i>SULF2</i>   | NM_018837    | c.2297C>T    | p.Thr766Ile       | 5/5 |
| <i>TFCP2L1</i> | NM_014553    | c.155G>T     | p.Cys52Phe        | 4/5 |
| <i>TGM5</i>    | NM_201631    | c.1769C>G    | p.Thr590Arg       | 4/5 |
| <i>TJP2</i>    | NM_001170416 | c.2477C>A    | p.Pro826Gln       | 3/5 |
| <i>WNT11</i>   | NM_004626    | c.1034A>C    | p.Glu345Ala       | 3/5 |
| <i>WNT2B</i>   | NM_024494    | c.407G>T     | p.Ser136Ile       | 5/5 |
| <i>WNT6</i>    | NM_006522    | c.663G>C     | p.Glu221Asp       | 4/5 |
| <i>WNT6</i>    | NM_006522    | c.568_586dup | p.Gly196Alafs*123 |     |
| <i>WNT9B</i>   | NM_003396    | c.434G>A     | p.Cys145Tyr       | 5/5 |
| <i>ZEB2</i>    | NM_014795    | c.1049C>T    | p.Thr350Met       | 3/5 |
| <i>ZNF106</i>  | NM_022473    | c.5569T>C    | p.Phe1857Leu      | 3/5 |
| <i>ZNF106</i>  | NM_022473    | c.1444dup    | p.Ser482Phefs*17  |     |

(a) according to Polyphen2 (probably and possibly damaging), Sift (deleterious), Mutation Taster (deleterious), Grantham (considered as deleterious when  $\geq 50$ ) and GVDG (considered as deleterious when  $\geq C25$ )

**Table S4. Analysis of microsatellite markers for validation of *de novo* PBX1 deletion in family 4 and paternity and maternity testing in the 5 families**

| Microsatellite markers | Position (Ensembl GrCh38) | nb alleles | % het | Family 1 |        |      | Family 2 |        |      | Family 3 |        |      | Family 4 |        |      | Family 5 |      |
|------------------------|---------------------------|------------|-------|----------|--------|------|----------|--------|------|----------|--------|------|----------|--------|------|----------|------|
|                        |                           |            |       | Father   | Mother | K175 | Father   | Mother | K179 | Father   | Mother | K186 | Father   | Mother | K181 | Mother   | K136 |
| D1S2675                | chr1:162240203-162240364  | 8          | 72    |          |        |      |          |        |      |          |        | 140  | 158      | 140    |      |          |      |
|                        |                           |            |       |          |        |      |          |        |      |          |        | 160  | 160      | 158    |      |          |      |
| D1S2844                | chr1:162979036-162979218  | 9          | 81    |          |        |      |          |        |      |          |        | 175  | 173      | 173    |      |          |      |
|                        |                           |            |       |          |        |      |          |        |      |          |        | 177  | 173      | 175    |      |          |      |
| D1S_PBX1_intron1       | chr1:164562453-164562494  | UK         | UK    |          |        |      |          |        |      |          |        | 286  | 286      | 288    |      |          |      |
|                        |                           |            |       |          |        |      |          |        |      |          |        | 288  | 286      | del    |      |          |      |
| D1S_PBX1_intron2-1     | chr1:164651931-164651970  | UK         | UK    |          |        |      |          |        |      |          |        | 214  | 212      | 214    |      |          |      |
|                        |                           |            |       |          |        |      |          |        |      |          |        | 230  | 226      | del    |      |          |      |
| D1S_PBX1_intron2-2     | chr1:164707419-164707456  | UK         | UK    |          |        |      |          |        |      |          |        | 156  | 164      | 156    |      |          |      |
|                        |                           |            |       |          |        |      |          |        |      |          |        | 162  | 166      | del    |      |          |      |
| D1S_PBX1_intron8       | chr1:164834030-164834070  | UK         | UK    |          |        |      |          |        |      |          |        | 330  | 320      | 332    |      |          |      |
|                        |                           |            |       |          |        |      |          |        |      |          |        | 332  | 322      | del    |      |          |      |
| D1S2762                | chr1:166986900-166987137  | 8          | 81    |          |        |      |          |        |      |          |        | 228  | 240      | 240    |      |          |      |
|                        |                           |            |       |          |        |      |          |        |      |          |        | 242  | 244      | 242    |      |          |      |
| D1S196                 | chr1:167635063-167635195  | 5          | 73    |          |        |      |          |        |      |          |        | 271  | 269      | 269    |      |          |      |
|                        |                           |            |       |          |        |      |          |        |      |          |        | 273  | 271      | 271    |      |          |      |
| D1S433                 | chr1: 168398939-168399082 | 6          | 59    | 146      | 146    | 148  |          |        |      |          |        | 146  | 148      | 146    |      |          |      |
|                        |                           |            |       | 148      | 150    | 150  |          |        |      |          |        | 150  | 150      | 150    |      |          |      |
| D1S2643                | chr1: 175553723-175553898 | 9          | 75    | 172      | 178    | 172  | 182      | 174    | 178  | 170      | 170    | 170  | 172      | 172    | 172  | 170      | 170  |
|                        |                           |            |       | 172      | 178    | 178  | 182      | 178    | 182  | 170      | 170    | 170  | 172      | 178    | 178  | 178      | 172  |
| D3S1270                | ch3:1406588-1406749       | 9          | 75    | 165      | 165    | 165  | 165      | 165    | 165  | 165      | 165    | 165  | 165      | 163    | 165  | 153      | 153  |
|                        |                           |            |       | 165      | 173    | 173  | 169      | 169    | 165  | 173      | 165    | 165  | 165      | 165    | 165  | 167      | 167  |
| D3S2446                | ch3: 81919331-81919574    | UK         | 69    | 238      | 238    | 238  | 238      | 238    | 238  | 234      | 234    | 238  | 238      | 234    | 234  | 238      | 238  |
|                        |                           |            |       | 246      | 246    | 246  | 246      | 238    | 246  | 238      | 238    | 238  | 242      | 242    | 238  | 238      | 238  |
| D3S4554                | ch3: 82542137-82542386    | UK         | 65    | 248      | 248    | 248  | 256      | 248    | 248  | 252      | 248    | 248  | 248      | 248    | 248  | 248      | 256  |
|                        |                           |            |       | 248      | 252    | 252  | 256      | 248    | 256  | 260      | 256    | 252  | 260      | 256    | 256  | 260      | 260  |
| D4S3351                | ch4: 158626043-158626231  | UK         | 82    | 182      | 198    | 198  | 186      | 176    | 186  | 174      | 182    | 174  | 178      | 178    | 178  | 182      | 182  |
|                        |                           |            |       | 202      | 198    | 202  | 210      | 202    | 202  | 186      | 190    | 182  | 186      | 178    | 178  | 182      | 182  |
| D6S1572                | ch6: 131016434-131016547  | 9          | 84    | 112      | 104    | 104  | 112      | 112    | 112  | 104      | 104    | 104  | 104      | 114    | 114  | 114      | 100  |
|                        |                           |            |       | 112      | 120    | 112  | 122      | 122    | 122  | 104      | 114    | 104  | 104      | 114    | 114  | 114      | 118  |
| D8S1820                | ch8: 28140086-28140196    | 7          | 73    | 98       | 106    | 106  | 104      | 104    | 104  | 98       | 98     | 98   | 98       | 98     | 98   | 106      | 106  |
|                        |                           |            |       | 106      | 108    | 106  | 104      | 104    | 104  | 106      | 98     | 106  | 108      | 106    | 98   | 106      | 106  |
| D13S1268               | ch13:66939348-66939481    | 9          | 80    | 122      | 118    | 118  | 118      | 120    | 136  | 120      | 130    | 120  | 118      | 134    | 134  | 120      | 120  |
|                        |                           |            |       | 136      | 140    | 136  | 136      | 140    | 140  | 120      | 136    | 136  | 140      | 136    | 140  | 142      | 120  |
| D14S997                | ch14:62233775-62233986    | 8          | 76    | 210      | 204    | 204  | 214      | 204    | 212  | 202      | 202    | 202  | 212      | 202    | 202  | 206      | 202  |
|                        |                           |            |       | 212      | 214    | 210  | 216      | 212    | 216  | 212      | 210    | 212  | 214      | 212    | 214  | 216      | 206  |
| D15S1510               | ch15: 80528302-80528551   | UK         | 52    | 244      | 248    | 248  | 248      | 248    | 248  | 244      | 248    | 248  | 244      | 248    | 244  | 252      | 248  |
|                        |                           |            |       | 256      | 248    | 256  | 252      | 248    | 252  | 248      | 248    | 248  | 252      | 248    | 248  | 252      | 252  |
| D15S211                | ch15:80900569-80900799    | 25         | 94    |          |        |      | 226      | 220    | 242  | 220      | 224    | 228  |          |        |      |          |      |
|                        |                           |            |       |          |        |      | 246      | 242    | 246  | 246      | 228    | 246  |          |        |      |          |      |
| D21S1903               | ch21:44721130-44721407    | 14         | 83    | 245      | 255    | 245  | 255      | 249    | 257  | 255      | 245    | 245  | 241      | 245    | 245  | 241      | 241  |
|                        |                           |            |       | 257      | 261    | 261  | 257      | 257    | 257  | 257      | 257    | 257  | 253      | 245    | 253  | 249      | 259  |
| D21S1446               | ch21: 46617673-46617893   | UK         | 76    |          |        |      |          |        |      |          |        |      | 206      | 206    | 206  | 206      | 206  |
|                        |                           |            |       |          |        |      |          |        |      |          |        |      | 210      | 210    | 210  | 206      | 206  |

Those 8 markers are referred to as A-H in Figure 1B

**Table S5. Burden analysis of rare variants in the unsolved CAKUT cases<sup>a</sup> (n=168) versus controls (n=426)**

| GENE                                                                                  | number of variants | Madsen   |       | Skat      |         |
|---------------------------------------------------------------------------------------|--------------------|----------|-------|-----------|---------|
|                                                                                       |                    | PVALUE   | STAT  | PVALUE    | STATRHO |
| <b>Variant frequency &lt; 0.1%, LOF + Missense damaging with polyphen 2 and Sift</b>  |                    |          |       |           |         |
| <i>DCHS2</i>                                                                          | 6                  | 0.003261 | 34677 | 0.0037375 | 0.2     |
| <i>FZD3</i>                                                                           | 2                  | 0.02437  | 35358 | 0.037478  | 1       |
| <i>GRHL2</i>                                                                          | 2                  | 0.02437  | 35358 | 0.037478  | 1       |
| <i>HOXD13</i>                                                                         | 4                  | 0.037197 | 35228 | 0.067466  | 0.8     |
| <i>ANOS1<sup>b</sup></i>                                                              | 3                  | 0.037197 | 35228 | 0.042087  | 1       |
| <i>ECM1</i>                                                                           | 4                  | 0.03771  | 35229 | 0.064325  | 0.7     |
| <i>SULF1</i>                                                                          | 4                  | 0.03771  | 35229 | 0.064325  | 0.7     |
| <i>SPOCK2</i>                                                                         | 4                  | 0.038232 | 35230 | 0.065785  | 0.7     |
| <i>TBC1D1</i>                                                                         | 3                  | ns       | ns    | 0.037546  | 1       |
| <b>Variant frequency &lt; 0.01%, LOF + Missense damaging with polyphen 2 and Sift</b> |                    |          |       |           |         |
| <i>ECM1</i>                                                                           | 2                  | 0.02437  | 35358 | 0.037478  | 1       |
| <i>FZD3</i>                                                                           | 2                  | 0.02437  | 35358 | 0.037478  | 1       |
| <i>GNB3</i>                                                                           | 2                  | 0.02437  | 35358 | 0.037478  | 1       |
| <i>GRHL2</i>                                                                          | 2                  | 0.02437  | 35358 | 0.037478  | 1       |
| <i>HOXD13</i>                                                                         | 2                  | 0.024371 | 35358 | 0.03938   | 1       |
| <i>DCHS2</i>                                                                          | 3                  | 0.037884 | 35230 | 0.039858  | 0.2     |
| <i>TBC1D1</i>                                                                         | 3                  | ns       | ns    | 0.037546  | 1       |

(a) cases with no mutation identified in *PBX1* and highly penetrant CAKUT genes (*HNF1B*, *PAX2*, *EYA1*, *ANOS1*, *GATA3*, *CHD7* or *KIF14*)

(b) heterozygous variants in female cases

ns: non significant

## Supplemental references

1. Gribouval, O., Moriniere, V., Pawtowski, A., Arrondel, C., Sallinen, S.L., Saloranta, C., Clericuzio, C., Viot, G., Tantau, J., Blesson, S., et al. (2012). Spectrum of mutations in the renin-angiotensin system genes in autosomal recessive renal tubular dysgenesis. *Hum Mutat* 33, 316-326.
2. Richer, J., Milewicz, D.M., Gow, R., de Nanassy, J., Maharajh, G., Miller, E., Oppenheimer, L., Weiler, G., and O'Connor, M. (2012). R179H mutation in ACTA2 expanding the phenotype to include prune-belly sequence and skin manifestations. *Am J Med Genet A* 158A, 664-668.
3. Thorson, W., Diaz-Horta, O., Foster, J., 2nd, Spiliopoulos, M., Quintero, R., Farooq, A., Blanton, S., and Tekin, M. (2014). De novo ACTG2 mutations cause congenital distended bladder, microcolon, and intestinal hypoperistalsis. *Hum Genet* 133, 737-742.
4. Hardelin, J.P., Levilliers, J., del Castillo, I., Cohen-Salmon, M., Legouis, R., Blanchard, S., Compain, S., Bouloux, P., Kirk, J., Moraine, C., et al. (1992). X chromosome-linked Kallmann syndrome: stop mutations validate the candidate gene. *Proc Natl Acad Sci U S A* 89, 8190-8194.
5. Kraus, M.R., Clauin, S., Pfister, Y., Di Maio, M., Ulinski, T., Constam, D., Bellanne-Chantelot, C., and Grapin-Botton, A. (2012). Two mutations in human BICC1 resulting in Wnt pathway hyperactivity associated with cystic renal dysplasia. *Hum Mutat* 33, 86-90.
6. Weber, S., Taylor, J.C., Winyard, P., Baker, K.F., Sullivan-Brown, J., Schild, R., Knuppel, T., Zurowska, A.M., Caldas-Alfonso, A., Litwin, M., et al. (2008). SIX2 and BMP4 mutations associate with anomalous kidney development. *J Am Soc Nephrol* 19, 891-903.
7. Hwang, D.Y., Dworschak, G.C., Kohl, S., Saisawat, P., Vivante, A., Hilger, A.C., Reutter, H.M., Soliman, N.A., Bogdanovic, R., Kehinde, E.O., et al. (2014). Mutations in 12 known dominant disease-causing genes clarify many congenital anomalies of the kidney and urinary tract. *Kidney Int* 85, 1429-1433.
8. Brockschmidt, A., Chung, B., Weber, S., Fischer, D.C., Kolatsi-Joannou, M., Christ, L., Heimbach, A., Shtiza, D., Klaus, G., Simonetti, G.D., et al. (2012). CHD1L: a new candidate gene for congenital anomalies of the kidneys and urinary tract (CAKUT). *Nephrol Dial Transplant* 27, 2355-2364.
9. Lalani, S.R., Safiullah, A.M., Fernbach, S.D., Harutyunyan, K.G., Thaller, C., Peterson, L.E., McPherson, J.D., Gibbs, R.A., White, L.D., Hefner, M., et al. (2006). Spectrum of CHD7 mutations in 110 individuals with CHARGE syndrome and genotype-phenotype correlation. *Am J Hum Genet* 78, 303-314.
10. Weber, S., Thiele, H., Mir, S., Toliat, M.R., Sozeri, B., Reutter, H., Draaken, M., Ludwig, M., Altmuller, J., Frommolt, P., et al. (2011). Muscarinic Acetylcholine Receptor M3 Mutation Causes Urinary Bladder Disease and a Prune-Belly-like Syndrome. *Am J Hum Genet* 89, 668-674.
11. Schild, R., Knuppel, T., Konrad, M., Bergmann, C., Trautmann, A., Kemper, M.J., Wu, K., Yaklichkin, S., Wang, J., Pestell, R., et al. (2013). Double homozygous missense mutations in DACH1 and BMP4 in a patient with bilateral cystic renal dysplasia. *Nephrol Dial Transplant* 28, 227-232.
12. Quelin, C., Loget, P., Verloes, A., Bazin, A., Bessieres, B., Laquerriere, A., Patrier, S., Grigorescu, R., Encha-Razavi, F., Delahaye, S., et al. (2012). Phenotypic spectrum of fetal Smith-Lemli-Opitz syndrome. *Eur J Med Genet* 55, 81-90.

13. Sanna-Cherchi, S., Sampogna, R.V., Papeta, N., Burgess, K.E., Nees, S.N., Perry, B.J., Choi, M., Bodria, M., Liu, Y., Weng, P.L., et al. (2013). Mutations in *DSTYK* and dominant urinary tract malformations. *N Engl J Med* 369, 621-629.
14. Harewood, L., Liu, M., Keeling, J., Howatson, A., Whiteford, M., Branney, P., Evans, M., Fantes, J., and Fitzpatrick, D.R. (2010). Bilateral renal agenesis/hypoplasia/dysplasia (BRAHD): postmortem analysis of 45 cases with breakpoint mapping of two de novo translocations. *PLoS One* 5, e12375.
15. Abdelhak, S., Kalatzis, V., Heilig, R., Compain, S., Samson, D., Vincent, C., Levi-Acobas, F., Cruaud, C., Le Merrer, M., Mathieu, M., et al. (1997). Clustering of mutations responsible for branchio-oto-renal (BOR) syndrome in the eyes absent homologous region (*eyaHR*) of *EYA1*. *Hum Mol Genet* 6, 2247-2255.
16. Unger, S., Bohm, D., Kaiser, F.J., Kaulfuss, S., Borozdin, W., Buiting, K., Burfeind, P., Bohm, J., Barrionuevo, F., Craig, A., et al. (2008). Mutations in the cyclin family member *FAM58A* cause an X-linked dominant disorder characterized by syndactyly, telecanthus and anogenital and renal malformations. *Nat Genet* 40, 287-289.
17. Barak, H., Huh, S.H., Chen, S., Jeanpierre, C., Martinovic, J., Parisot, M., Bole-Feysot, C., Nitschke, P., Salomon, R., Antignac, C., et al. (2012). *FGF9* and *FGF20* maintain the stemness of nephron progenitors in mice and man. *Dev Cell* 22, 1191-1207.
18. Saisawat, P., Tasic, V., Vega-Warner, V., Kehinde, E.O., Gunther, B., Airik, R., Innis, J.W., Hoskins, B.E., Hoefele, J., Otto, E.A., et al. (2012). Identification of two novel *CAKUT*-causing genes by massively parallel exon resequencing of candidate genes in patients with unilateral renal agenesis. *Kidney Int* 81, 196-200.
19. Alazami, A.M., Shaheen, R., Alzahrani, F., Snape, K., Saggar, A., Brinkmann, B., Bavi, P., Al-Gazali, L.I., and Alkuraya, F.S. (2009). *FREM1* mutations cause bifid nose, renal agenesis, and anorectal malformations syndrome. *Am J Hum Genet* 85, 414-418.
20. Van Esch, H., Groenen, P., Nesbit, M.A., Schuffenhauer, S., Lichtner, P., Vanderlinden, G., Harding, B., Beetz, R., Bilous, R.W., Holdaway, I., et al. (2000). *GATA3* haploinsufficiency causes human HDR syndrome. *Nature* 406, 419-422.
21. Tassabehji, M., Fang, Z.M., Hilton, E.N., McGaughan, J., Zhao, Z., de Bock, C.E., Howard, E., Malass, M., Donnai, D., Diwan, A., et al. (2008). Mutations in *GDF6* are associated with vertebral segmentation defects in Klippel-Feil syndrome. *Hum Mutat* 29, 1017-1027.
22. Johnston, J.J., Olivos-Glander, I., Killoran, C., Elson, E., Turner, J.T., Peters, K.F., Abbott, M.H., Aughton, D.J., Aylsworth, A.S., Bamshad, M.J., et al. (2005). Molecular and clinical analyses of Greig cephalopolysyndactyly and Pallister-Hall syndromes: robust phenotype prediction from the type and position of *GLI3* mutations. *Am J Hum Genet* 76, 609-622.
23. Pilia, G., Hughes-Benzie, R.M., MacKenzie, A., Baybayan, P., Chen, E.Y., Huber, R., Neri, G., Cao, A., Forabosco, A., and Schlessinger, D. (1996). Mutations in *GPC3*, a glypican gene, cause the Simpson-Golabi-Behmel overgrowth syndrome. *Nat Genet* 12, 241-247.
24. Vogel, M.J., van Zon, P., Brueton, L., Gijzen, M., van Tuil, M.C., Cox, P., Schanze, D., Kariminejad, A., Ghaderi-Sohi, S., Blair, E., et al. (2012). Mutations in *GRIP1* cause Fraser syndrome. *J Med Genet* 49, 303-306.
25. Heidet, L., Decramer, S., Pawtowski, A., Moriniere, V., Bandin, F., Knebelmann, B., Lebre, A.S., Faguer, S., Guigonis, V., Antignac, C., et al. (2010). Spectrum of *HNF1B* mutations in a large cohort of patients who harbor renal diseases. *Clin J Am Soc Nephrol* 5, 1079-1090.

26. Daly, S.B., Urquhart, J.E., Hilton, E., McKenzie, E.A., Kammerer, R.A., Lewis, M., Kerr, B., Stuart, H., Donnai, D., Long, D.A., et al. (2010). Mutations in HPSE2 cause urofacial syndrome. *Am J Hum Genet* 86, 963-969.
27. Has, C., Sparta, G., Kiritsi, D., Weibel, L., Moeller, A., Vega-Warner, V., Waters, A., He, Y., Anikster, Y., Esser, P., et al. (2012). Integrin alpha3 mutations with kidney, lung, and skin disease. *N Engl J Med* 366, 1508-1514.
28. Humbert, C., Silbermann, F., Morar, B., Parisot, M., Zarhrate, M., Masson, C., Tores, F., Blanchet, P., Perez, M.J., Petrov, Y., et al. (2014). Integrin alpha 8 recessive mutations are responsible for bilateral renal agenesis in humans. *Am J Hum Genet* 94, 288-294.
29. Oda, T., Elkahlon, A.G., Pike, B.L., Okajima, K., Krantz, I.D., Genin, A., Piccoli, D.A., Meltzer, P.S., Spinner, N.B., Collins, F.S., et al. (1997). Mutations in the human *Jagged1* gene are responsible for Alagille syndrome. *Nat Genet* 16, 235-242.
30. Filges, I., Nosova, E., Bruder, E., Tercanli, S., Townsend, K., Gibson, W.T., Rothlisberger, B., Heinimann, K., Hall, J.G., Gregory-Evans, C.Y., et al. (2014). Exome sequencing identifies mutations in *KIF14* as a novel cause of an autosomal recessive lethal fetal ciliopathy phenotype. *Clin Genet* 86, 220-228.
31. Stuart, H.M., Roberts, N.A., Burgu, B., Daly, S.B., Urquhart, J.E., Bhaskar, S., Dickerson, J.E., Mermerkaya, M., Silay, M.S., Lewis, M.A., et al. (2013). *LRIG2* mutations cause urofacial syndrome. *Am J Hum Genet* 92, 259-264.
32. Khan, T.N., Klar, J., Ali, Z., Khan, F., Baig, S.M., and Dahl, N. (2013). Cenani-Lenz syndrome restricted to limb and kidney anomalies associated with a novel *LRP4* missense mutation. *Eur J Med Genet* 56, 371-374.
33. Grampa, V., Delous, M., Zaidan, M., Ody, G., Thomas, S., Elkhartoufi, N., Filhol, E., Niel, O., Silbermann, F., Lebreton, C., et al. (2016). Novel *NEK8* Mutations Cause Severe Syndromic Renal Cystic Dysplasia through *YAP* Dysregulation. *PLoS Genet* 12, e1005894.
34. Kamath, B.M., Spinner, N.B., and Rosenblum, N.D. (2013). Renal involvement and the role of Notch signalling in Alagille syndrome. *Nat Rev Nephrol* 9, 409-418.
35. Bower, M., Salomon, R., Allanson, J., Antignac, C., Benedicenti, F., Benetti, E., Binenbaum, G., Jensen, U.B., Cochat, P., DeCramer, S., et al. (2012). Update of *PAX2* mutations in renal coloboma syndrome and establishment of a locus-specific database. *Hum Mutat* 33, 457-466.
36. Gribouval, O., Gonzales, M., Neuhaus, T., Aziza, J., Bieth, E., Laurent, N., Bouton, J.M., Feuillet, F., Makni, S., Ben Amar, H., et al. (2005). Mutations in genes in the renin-angiotensin system are associated with autosomal recessive renal tubular dysgenesis. *Nat Genet* 37, 964-968.
37. Skinner, M.A., Safford, S.D., Reeves, J.G., Jackson, M.E., and Freerman, A.J. (2008). Renal aplasia in humans is associated with *RET* mutations. *Am J Hum Genet* 82, 344-351.
38. Hwang, D.Y., Kohl, S., Fan, X., Vivante, A., Chan, S., Dworschak, G.C., Schulz, J., van Eerde, A.M., Hilger, A.C., Gee, H.Y., et al. (2015). Mutations of the *SLIT2-ROBO2* pathway genes *SLIT2* and *SRGAP1* confer risk for congenital anomalies of the kidney and urinary tract. *Hum Genet* 134, 905-916.
39. Botzenhart, E.M., Green, A., Ilyina, H., Konig, R., Lowry, R.B., Lo, I.F., Shohat, M., Burke, L., McGaughan, J., Chafai, R., et al. (2005). *SALL1* mutation analysis in Townes-Brocks syndrome: twelve novel mutations and expansion of the phenotype. *Hum Mutat* 26, 282.
40. Kohlhase, J., Heinrich, M., Schubert, L., Liebers, M., Kispert, A., Laccone, F., Turnpenny, P., Winter, R.M., and Reardon, W. (2002). Okihiro syndrome is caused by *SALL4* mutations. *Hum Mol Genet* 11, 2979-2987.



41. Weber, S., Moriniere, V., Knuppel, T., Charbit, M., Dusek, J., Ghiggeri, G.M., Jankauskiene, A., Mir, S., Montini, G., Peco-Antic, A., et al. (2006). Prevalence of mutations in renal developmental genes in children with renal hypodysplasia: results of the ESCAPE study. *J Am Soc Nephrol* 17, 2864-2870.
42. Krug, P., Moriniere, V., Marlin, S., Koubi, V., Gabriel, H.D., Colin, E., Bonneau, D., Salomon, R., Antignac, C., and Heidet, L. (2011). Mutation screening of the EYA1, SIX1, and SIX5 genes in a large cohort of patients harboring branchio-oto-renal syndrome calls into question the pathogenic role of SIX5 mutations. *Hum Mutat* 32, 183-190.
43. Gimelli, S., Caridi, G., Beri, S., McCracken, K., Bocciardi, R., Zordan, P., Dagnino, M., Fiorio, P., Murer, L., Benetti, E., et al. (2010). Mutations in SOX17 are associated with congenital anomalies of the kidney and the urinary tract. *Hum Mutat* 31, 1352-1359.
44. Kosfeld, A., Kreuzer, M., Daniel, C., Brand, F., Schafer, A.K., Chadt, A., Weiss, A.C., Riehmer, V., Jeanpierre, C., Klintschar, M., et al. (2016). Whole-exome sequencing identifies mutations of TBC1D1 encoding a Rab-GTPase-activating protein in patients with congenital anomalies of the kidneys and urinary tract (CAKUT). *Hum Genet* 135, 69-87.
45. Vivante, A., Kleppa, M.J., Schulz, J., Kohl, S., Sharma, A., Chen, J., Shril, S., Hwang, D.Y., Weiss, A.C., Kaminski, M.M., et al. (2015). Mutations in TBX18 Cause Dominant Urinary Tract Malformations via Transcriptional Dysregulation of Ureter Development. *Am J Hum Genet* 97, 291-301.
46. Gbadegesin, R.A., Brophy, P.D., Adeyemo, A., Hall, G., Gupta, I.R., Hains, D., Bartkowiak, B., Rabinovich, C.E., Chandrasekharappa, S., Homstad, A., et al. (2013). TNXB mutations can cause vesicoureteral reflux. *J Am Soc Nephrol* 24, 1313-1322.
47. Saisawat, P., Kohl, S., Hilger, A.C., Hwang, D.Y., Yung Gee, H., Dworschak, G.C., Tasic, V., Pennimpede, T., Natarajan, S., Sperry, E., et al. (2014). Whole-exome resequencing reveals recessive mutations in TRAP1 in individuals with CAKUT and VACTERL association. *Kidney Int* 85, 1310-1317.
48. Dahan, K., Devuyst, O., Smaers, M., Vertommen, D., Loute, G., Poux, J.M., Viron, B., Jacquot, C., Gagnadoux, M.F., Chauveau, D., et al. (2003). A cluster of mutations in the UMOD gene causes familial juvenile hyperuricemic nephropathy with abnormal expression of uromodulin. *J Am Soc Nephrol* 14, 2883-2893.
49. van Eerde, A.M., Duran, K., van Riel, E., de Kovel, C.G., Koeleman, B.P., Knoers, N.V., Renkema, K.Y., van der Horst, H.J., Bokenkamp, A., van Hagen, J.M., et al. (2012). Genes in the ureteric budding pathway: association study on vesico-ureteral reflux patients. *PLoS One* 7, e31327.
50. Vivante, A., Mark-Danieli, M., Davidovits, M., Harari-Steinberg, O., Omer, D., Gnatek, Y., Cleper, R., Landau, D., Kovalski, Y., Weissman, I., et al. (2013). Renal hypodysplasia associates with a WNT4 variant that causes aberrant canonical WNT signaling. *J Am Soc Nephrol* 24, 550-558.
51. Ichiki, T., Labosky, P.A., Shiota, C., Okuyama, S., Imagawa, Y., Fogo, A., Niimura, F., Ichikawa, I., Hogan, B.L., and Inagami, T. (1995). Effects on blood pressure and exploratory behaviour of mice lacking angiotensin II type-2 receptor. *Nature* 377, 748-750.
52. Mic, F.A., Haselbeck, R.J., Cuenca, A.E., and Duester, G. (2002). Novel retinoic acid generating activities in the neural tube and heart identified by conditional rescue of Raldh2 null mutant mice. *Development* 129, 2271-2282.
53. Moisan, A., Rivera, M.N., Lotinun, S., Akhavanfard, S., Coffman, E.J., Cook, E.B., Stoykova, S., Mukherjee, S., Schoonmaker, J.A., Burger, A., et al. (2011). The WTX

- tumor suppressor regulates mesenchymal progenitor cell fate specification. *Dev Cell* 20, 583-596.
54. McDill, B.W., Li, S.Z., Kovach, P.A., Ding, L., and Chen, F. (2006). Congenital progressive hydronephrosis (cph) is caused by an S256L mutation in aquaporin-2 that affects its phosphorylation and apical membrane accumulation. *Proc Natl Acad Sci U S A* 103, 6952-6957.
  55. Goggolidou, P., Hadjirin, N.F., Bak, A., Papakrivopoulou, E., Hilton, H., Norris, D.P., and Dean, C.H. (2014). Atmin mediates kidney morphogenesis by modulating Wnt signaling. *Hum Mol Genet* 23, 5303-5316.
  56. Veis, D.J., Sorenson, C.M., Shutter, J.R., and Korsmeyer, S.J. (1993). Bcl-2-deficient mice demonstrate fulminant lymphoid apoptosis, polycystic kidneys, and hypopigmented hair. *Cell* 75, 229-240.
  57. Fan, H., Stefkova, J., and El-Dahr, S.S. (2006). Susceptibility to metanephric apoptosis in bradykinin B2 receptor null mice via the p53-Bax pathway. *Am J Physiol Renal Physiol* 291, F670-682.
  58. Jena, N., Martin-Seisdedos, C., McCue, P., and Croce, C.M. (1997). BMP7 null mutation in mice: developmental defects in skeleton, kidney, and eye. *Exp Cell Res* 230, 28-37.
  59. Ikeya, M., Fukushima, K., Kawada, M., Onishi, S., Furuta, Y., Yonemura, S., Kitamura, T., Nosaka, T., and Sasai, Y. (2010). Cv2, functioning as a pro-BMP factor via twisted gastrulation, is required for early development of nephron precursors. *Dev Biol* 337, 405-414.
  60. Mah, S.P., Saueressig, H., Goulding, M., Kintner, C., and Dressler, G.R. (2000). Kidney development in cadherin-6 mutants: delayed mesenchyme-to-epithelial conversion and loss of nephrons. *Dev Biol* 223, 38-53.
  61. Chi, L., Saarela, U., Railo, A., Prunskaitė-Hyyryläinen, R., Skovorodkin, I., Anthony, S., Katsu, K., Liu, Y., Shan, J., Salgueiro, A.M., et al. (2011). A secreted BMP antagonist, Cer1, fine tunes the spatial organization of the ureteric bud tree during mouse kidney development. *PLoS One* 6, e27676.
  62. Kuure, S., Cebrian, C., Machingo, Q., Lu, B.C., Chi, X., Hyink, D., D'Agati, V., Gurniak, C., Witke, W., and Costantini, F. (2010). Actin depolymerizing factors cofilin1 and destrin are required for ureteric bud branching morphogenesis. *PLoS Genet* 6, e1001176.
  63. Wilkinson, L., Kurniawan, N.D., Phua, Y.L., Nguyen, M.J., Li, J., Galloway, G.J., Hashitani, H., Lang, R.J., and Little, M.H. (2012). Association between congenital defects in papillary outgrowth and functional obstruction in *Crim1* mutant mice. *J Pathol* 227, 499-510.
  64. Bridgewater, D., Di Giovanni, V., Cain, J.E., Cox, B., Jakobson, M., Sainio, K., and Rosenblum, N.D. (2011). beta-catenin causes renal dysplasia via upregulation of *Tgfbeta2* and *Dkk1*. *J Am Soc Nephrol* 22, 718-731.
  65. Hasegawa, Y., Satoh, K., Iizuka-Kogo, A., Shimomura, A., Nomura, R., Akiyama, T., and Senda, T. (2007). Loss of ICAT gene function leads to arrest of ureteric bud branching and renal agenesis. *Biochem Biophys Res Commun* 362, 988-994.
  66. San Agustin, J.T., Klena, N., Granath, K., Panigrahy, A., Stewart, E., Devine, W., Strittmatter, L., Jonassen, J.A., Liu, X., Lo, C.W., et al. (2016). Genetic link between renal birth defects and congenital heart disease. *Nat Commun* 7, 11103.
  67. Suriben, R., Kivimäe, S., Fisher, D.A., Moon, R.T., and Cheyette, B.N. (2009). Posterior malformations in *Dact1* mutant mice arise through misregulated *Vangl2* at the primitive streak. *Nat Genet* 41, 977-985.
  68. Mao, Y., Mulvaney, J., Zakaria, S., Yu, T., Morgan, K.M., Allen, S., Basson, M.A., Francis-West, P., and Irvine, K.D. (2011). Characterization of a *Dchs1* mutant mouse

- reveals requirements for Dchs1-Fat4 signaling during mammalian development. *Development* 138, 947-957.
69. Fetting, J.L., Guay, J.A., Karolak, M.J., Iozzo, R.V., Adams, D.C., Maridas, D.E., Brown, A.C., and Oxburgh, L. (2014). FOXD1 promotes nephron progenitor differentiation by repressing decorin in the embryonic kidney. *Development* 141, 17-27.
  70. Naim, E., Bernstein, A., Bertram, J.F., and Caruana, G. (2005). Mutagenesis of the epithelial polarity gene, discs large 1, perturbs nephrogenesis in the developing mouse kidney. *Kidney Int* 68, 955-965.
  71. Liu, Z., Chen, S., Boyle, S., Zhu, Y., Zhang, A., Piwnicka-Worms, D.R., Ilagan, M.X., and Kopan, R. (2013). The extracellular domain of Notch2 increases its cell-surface abundance and ligand responsiveness during kidney development. *Dev Cell* 25, 585-598.
  72. Paroly, S.S., Wang, F., Spraggon, L., Merregaert, J., Batourina, E., Tycko, B., Schmidt-Ott, K.M., Grimmond, S., Little, M., and Mendelsohn, C. (2013). Stromal protein *Ecm1* regulates ureteric bud patterning and branching. *PLoS One* 8, e84155.
  73. Zhang, Z., Pascuet, E., Hueber, P.A., Chu, L., Bichet, D.G., Lee, T.C., Threadgill, D.W., and Goodyer, P. (2010). Targeted inactivation of EGF receptor inhibits renal collecting duct development and function. *J Am Soc Nephrol* 21, 573-578.
  74. Miyamoto, N., Yoshida, M., Kuratani, S., Matsuo, I., and Aizawa, S. (1997). Defects of urogenital development in mice lacking *Emx2*. *Development* 124, 1653-1664.
  75. Weiss, A.C., Airik, R., Bohnenpoll, T., Greulich, F., Foik, A., Trowe, M.O., Rudat, C., Costantini, F., Adams, R.H., and Kispert, A. (2014). Nephric duct insertion requires *EphA4/EphA7* signaling from the pericloacal mesenchyme. *Development* 141, 3420-3430.
  76. Kuure, S., Chi, X., Lu, B., and Costantini, F. (2010). The transcription factors *Etv4* and *Etv5* mediate formation of the ureteric bud tip domain during kidney development. *Development* 137, 1975-1979.
  77. Fogelgren, B., Polgar, N., Lui, V.H., Lee, A.J., Tamashiro, K.K., Napoli, J.A., Walton, C.B., Zuo, X., and Lipschutz, J.H. (2015). Urothelial Defects from Targeted Inactivation of *Exocyst Sec10* in Mice Cause Ureteropelvic Junction Obstructions. *PLoS One* 10, e0129346.
  78. Ciani, L., Patel, A., Allen, N.D., and French-Constant, C. (2003). Mice lacking the giant protocadherin *mFAT1* exhibit renal slit junction abnormalities and a partially penetrant cyclopia and anophthalmia phenotype. *Mol Cell Biol* 23, 3575-3582.
  79. Saburi, S., Hester, I., Fischer, E., Pontoglio, M., Eremina, V., Gessler, M., Quaggin, S.E., Harrison, R., Mount, R., and McNeill, H. (2008). Loss of *Fat4* disrupts PCP signaling and oriented cell division and leads to cystic kidney disease. *Nat Genet* 40, 1010-1015.
  80. Michos, O., Cebrian, C., Hyink, D., Grieshammer, U., Williams, L., D'Agati, V., Licht, J.D., Martin, G.R., and Costantini, F. (2010). Kidney development in the absence of *Gdnf* and *Spry1* requires *Fgf10*. *PLoS Genet* 6, e1000809.
  81. Qiao, J., Uzzo, R., Obara-Ishihara, T., Degenstein, L., Fuchs, E., and Herzlinger, D. (1999). FGF-7 modulates ureteric bud growth and nephron number in the developing kidney. *Development* 126, 547-554.
  82. Perantoni, A.O., Timofeeva, O., Naillat, F., Richman, C., Pajni-Underwood, S., Wilson, C., Vainio, S., Dove, L.F., and Lewandoski, M. (2005). Inactivation of *FGF8* in early mesoderm reveals an essential role in kidney development. *Development* 132, 3859-3871.
  83. Poladia, D.P., Kish, K., Kutay, B., Hains, D., Kegg, H., Zhao, H., and Bates, C.M. (2006). Role of fibroblast growth factor receptors 1 and 2 in the metanephric mesenchyme. *Dev Biol* 291, 325-339.

84. Gerber, S.D., Steinberg, F., Beyeler, M., Villiger, P.M., and Trueb, B. (2009). The murine Fgfr11 receptor is essential for the development of the metanephric kidney. *Dev Biol* 335, 106-119.
85. Chao, C.W., Chan, D.C., Kuo, A., and Leder, P. (1998). The mouse formin (Fmn) gene: abundant circular RNA transcripts and gene-targeted deletion analysis. *Mol Med* 4, 614-628.
86. Kume, T., Deng, K., and Hogan, B.L. (2000). Murine forkhead/winged helix genes Foxc1 (Mf1) and Foxc2 (Mfh1) are required for the early organogenesis of the kidney and urinary tract. *Development* 127, 1387-1395.
87. Hatini, V., Huh, S.O., Herzlinger, D., Soares, V.C., and Lai, E. (1996). Essential role of stromal mesenchyme in kidney morphogenesis revealed by targeted disruption of Winged Helix transcription factor BF-2. *Genes Dev* 10, 1467-1478.
88. Adams, D., Larman, B., and Oxburgh, L. (2007). Developmental expression of mouse Follistatin-like 1 (Fstl1): Dynamic regulation during organogenesis of the kidney and lung. *Gene Expr Patterns* 7, 491-500.
89. Hoshino, T., Shimizu, R., Ohmori, S., Nagano, M., Pan, X., Ohneda, O., Khandekar, M., Yamamoto, M., Lim, K.C., and Engel, J.D. (2008). Reduced BMP4 abundance in Gata2 hypomorphic mutant mice result in uropathies resembling human CAKUT. *Genes Cells* 13, 159-170.
90. Esquela, A.F., and Lee, S.J. (2003). Regulation of metanephric kidney development by growth/differentiation factor 11. *Dev Biol* 257, 356-370.
91. Sanchez, M.P., Silos-Santiago, I., Frisen, J., He, B., Lira, S.A., and Barbacid, M. (1996). Renal agenesis and the absence of enteric neurons in mice lacking GDNF. *Nature* 382, 70-73.
92. Tomac, A.C., Grinberg, A., Huang, S.P., Nosrat, C., Wang, Y., Borlongan, C., Lin, S.Z., Chiang, Y.H., Olson, L., Westphal, H., et al. (2000). Glial cell line-derived neurotrophic factor receptor alpha1 availability regulates glial cell line-derived neurotrophic factor signaling: evidence from mice carrying one or two mutated alleles. *Neuroscience* 95, 1011-1023.
93. Li, J.P., Gong, F., Hagner-McWhirter, A., Forsberg, E., Abrink, M., Kisilevsky, R., Zhang, X., and Lindahl, U. (2003). Targeted disruption of a murine glucuronyl C5-epimerase gene results in heparan sulfate lacking L-iduronic acid and in neonatal lethality. *J Biol Chem* 278, 28363-28366.
94. Michos, O., Panman, L., Vintersten, K., Beier, K., Zeller, R., and Zuniga, A. (2004). Gremlin-mediated BMP antagonism induces the epithelial-mesenchymal feedback signaling controlling metanephric kidney and limb organogenesis. *Development* 131, 3401-3410.
95. Aue, A., Hinze, C., Walentin, K., Ruffert, J., Yurtdas, Y., Werth, M., Chen, W., Rabien, A., Kilic, E., Schulzke, J.D., et al. (2015). A Grainyhead-Like 2/Ovo-Like 2 Pathway Regulates Renal Epithelial Barrier Function and Lumen Expansion. *J Am Soc Nephrol* 26, 2704-2715.
96. Wellik, D.M., Hawkes, P.J., and Capecchi, M.R. (2002). Hox11 paralogous genes are essential for metanephric kidney induction. *Genes Dev* 16, 1423-1432.
97. Bullock, S.L., Fletcher, J.M., Beddington, R.S., and Wilson, V.A. (1998). Renal agenesis in mice homozygous for a gene trap mutation in the gene encoding heparan sulfate 2-sulfotransferase. *Genes Dev* 12, 1894-1906.
98. Smeeton, J., Zhang, X., Bulus, N., Mernaugh, G., Lange, A., Karner, C.M., Carroll, T.J., Fassler, R., Pozzi, A., Rosenblum, N.D., et al. (2010). Integrin-linked kinase regulates p38 MAPK-dependent cell cycle arrest in ureteric bud development. *Development* 137, 3233-3243.

99. Kaku, Y., Ohmori, T., Kudo, K., Fujimura, S., Suzuki, K., Evans, S.M., Kawakami, Y., and Nishinakamura, R. (2013). Islet1 deletion causes kidney agenesis and hydronephrosis resembling CAKUT. *J Am Soc Nephrol* 24, 1242-1249.
100. Zhang, X., Mernaugh, G., Yang, D.H., Gewin, L., Srichai, M.B., Harris, R.C., Iturregui, J.M., Nelson, R.D., Kohan, D.E., Abrahamson, D., et al. (2009). beta1 integrin is necessary for ureteric bud branching morphogenesis and maintenance of collecting duct structural integrity. *Development* 136, 3357-3366.
101. Uchiyama, Y., Sakaguchi, M., Terabayashi, T., Inenaga, T., Inoue, S., Kobayashi, C., Oshima, N., Kiyonari, H., Nakagata, N., Sato, Y., et al. (2010). Kif26b, a kinesin family gene, regulates adhesion of the embryonic kidney mesenchyme. *Proc Natl Acad Sci U S A* 107, 9240-9245.
102. Lin, F., Hiesberger, T., Cordes, K., Sinclair, A.M., Goldstein, L.S., Somlo, S., and Igarashi, P. (2003). Kidney-specific inactivation of the KIF3A subunit of kinesin-II inhibits renal ciliogenesis and produces polycystic kidney disease. *Proc Natl Acad Sci U S A* 100, 5286-5291.
103. Yi, T., Tan, K., Cho, S.G., Wang, Y., Luo, J., Zhang, W., Li, D., and Liu, M. (2010). Regulation of embryonic kidney branching morphogenesis and glomerular development by KISS1 receptor (Gpr54) through NFAT2- and Sp1-mediated Bmp7 expression. *J Biol Chem* 285, 17811-17820.
104. Shannon, M.B., Patton, B.L., Harvey, S.J., and Miner, J.H. (2006). A hypomorphic mutation in the mouse laminin alpha5 gene causes polycystic kidney disease. *J Am Soc Nephrol* 17, 1913-1922.
105. Willem, M., Miosge, N., Halfter, W., Smyth, N., Jannetti, I., Burghart, E., Timpl, R., and Mayer, U. (2002). Specific ablation of the nidogen-binding site in the laminin gamma1 chain interferes with kidney and lung development. *Development* 129, 2711-2722.
106. Kinzel, B., Pikiolak, M., Orsini, V., Sprunger, J., Isken, A., Zietzling, S., Desplanches, M., Dubost, V., Breustedt, D., Valdez, R., et al. (2014). Functional roles of Lgr4 and Lgr5 in embryonic gut, kidney and skin development in mice. *Dev Biol* 390, 181-190.
107. Kobayashi, A., Kwan, K.M., Carroll, T.J., McMahon, A.P., Mendelsohn, C.L., and Behringer, R.R. (2005). Distinct and sequential tissue-specific activities of the LIM-class homeobox gene *Lim1* for tubular morphogenesis during kidney development. *Development* 132, 2809-2823.
108. Peng, Y., Clark, C., Luong, R., Tu, W.H., Lee, J., Johnson, D.T., Das, A., Carroll, T.J., and Sun, Z. (2011). The leucine zipper putative tumor suppressor 2 protein LZTS2 regulates kidney development. *J Biol Chem* 286, 40331-40342.
109. Arnould, C., Lelievre-Pegorier, M., Ronco, P., and Lelongt, B. (2009). MMP9 limits apoptosis and stimulates branching morphogenesis during kidney development. *J Am Soc Nephrol* 20, 2171-2180.
110. Bates, C.M., Kharzai, S., Erwin, T., Rossant, J., and Parada, L.F. (2000). Role of N-myc in the developing mouse kidney. *Dev Biol* 222, 317-325.
111. Lu, W., Quintero-Rivera, F., Fan, Y., Alkuraya, F.S., Donovan, D.J., Xi, Q., Turbe-Doan, A., Li, Q.G., Campbell, C.G., Shanske, A.L., et al. (2007). NFIA haploinsufficiency is associated with a CNS malformation syndrome and urinary tract defects. *PLoS Genet* 3, e80.
112. Linton, J.M., Martin, G.R., and Reichardt, L.F. (2007). The ECM protein nephronectin promotes kidney development via integrin alpha8beta1-mediated stimulation of Gdnf expression. *Development* 134, 2501-2509.

113. Yu, C.T., Tang, K., Suh, J.M., Jiang, R., Tsai, S.Y., and Tsai, M.J. (2012). COUP-TFII is essential for metanephric mesenchyme formation and kidney precursor cell survival. *Development* 139, 2330-2339.
114. Wang, Q., Lan, Y., Cho, E.S., Maltby, K.M., and Jiang, R. (2005). Odd-skipped related 1 (Odd 1) is an essential regulator of heart and urogenital development. *Dev Biol* 288, 582-594.
115. Lange, A., Wickstrom, S.A., Jakobson, M., Zent, R., Sainio, K., and Fassler, R. (2009). Integrin-linked kinase is an adaptor with essential functions during mouse development. *Nature* 461, 1002-1006.
116. Narlis, M., Grote, D., Gaitan, Y., Boualia, S.K., and Bouchard, M. (2007). Pax2 and pax8 regulate branching morphogenesis and nephron differentiation in the developing kidney. *J Am Soc Nephrol* 18, 1121-1129.
117. Schnabel, C.A., Godin, R.E., and Cleary, M.L. (2003). Pbx1 regulates nephrogenesis and ureteric branching in the developing kidney. *Dev Biol* 254, 262-276.
118. Nakai, S., Sugitani, Y., Sato, H., Ito, S., Miura, Y., Ogawa, M., Nishi, M., Jishage, K., Minowa, O., and Noda, T. (2003). Crucial roles of Brn1 in distal tubule formation and function in mouse kidney. *Development* 130, 4751-4759.
119. Chang, C.P., McDill, B.W., Neilson, J.R., Joist, H.E., Epstein, J.A., Crabtree, G.R., and Chen, F. (2004). Calcineurin is required in urinary tract mesenchyme for the development of the pyeloureteral peristaltic machinery. *J Clin Invest* 113, 1051-1058.
120. Maezawa, Y., Binnie, M., Li, C., Thorner, P., Hui, C.C., Alman, B., Taketo, M.M., and Quaggin, S.E. (2012). A new Cre driver mouse line, Tcf21/Pod1-Cre, targets metanephric mesenchyme. *PLoS One* 7, e40547.
121. Slattery, P., Frolich, S., Schreiber, Y., and Nusing, R.M. (2016). COX-2 gene dosage-dependent defects in kidney development. *Am J Physiol Renal Physiol* 310, F1113-1122.
122. Batourina, E., Gim, S., Bello, N., Shy, M., Clagett-Dame, M., Srinivas, S., Costantini, F., and Mendelsohn, C. (2001). Vitamin A controls epithelial/mesenchymal interactions through Ret expression. *Nat Genet* 27, 74-78.
123. Bonegio, R.G., Beck, L.H., Kahlon, R.K., Lu, W., and Salant, D.J. (2011). The fate of Notch-deficient nephrogenic progenitor cells during metanephric kidney development. *Kidney Int* 79, 1099-1112.
124. Kim, B.J., Zaveri, H.P., Shchelochkov, O.A., Yu, Z., Hernandez-Garcia, A., Seymour, M.L., Oghalai, J.S., Pereira, F.A., Stockton, D.W., Justice, M.J., et al. (2013). An allelic series of mice reveals a role for RERE in the development of multiple organs affected in chromosome 1p36 deletions. *PLoS One* 8, e57460.
125. Reidy, K., and Tufro, A. (2011). Semaphorins in kidney development and disease: modulators of ureteric bud branching, vascular morphogenesis, and podocyte-endothelial crosstalk. *Pediatr Nephrol* 26, 1407-1412.
126. Yu, J., Carroll, T.J., and McMahon, A.P. (2002). Sonic hedgehog regulates proliferation and differentiation of mesenchymal cells in the mouse metanephric kidney. *Development* 129, 5301-5312.
127. Oxburgh, L., Chu, G.C., Michael, S.K., and Robertson, E.J. (2004). TGFbeta superfamily signals are required for morphogenesis of the kidney mesenchyme progenitor population. *Development* 131, 4593-4605.
128. Murugan, S., Shan, J., Kuhl, S.J., Tata, A., Pietila, I., Kuhl, M., and Vainio, S.J. (2012). WT1 and Sox11 regulate synergistically the promoter of the Wnt4 gene that encodes a critical signal for nephrogenesis. *Exp Cell Res* 318, 1134-1145.
129. Huang, J., Arsenault, M., Kann, M., Lopez-Mendez, C., Saleh, M., Wadowska, D., Taglienti, M., Ho, J., Miao, Y., Sims, D., et al. (2013). The transcription factor Sry-

- related HMG box-4 (SOX4) is required for normal renal development in vivo. *Dev Dyn* 242, 790-799.
130. Reginensi, A., Clarkson, M., Neirijnck, Y., Lu, B., Ohyama, T., Groves, A.K., Sock, E., Wegner, M., Costantini, F., Chaboissier, M.C., et al. (2011). SOX9 controls epithelial branching by activating RET effector genes during kidney development. *Hum Mol Genet* 20, 1143-1153.
  131. Basson, M.A., Akbulut, S., Watson-Johnson, J., Simon, R., Carroll, T.J., Shakya, R., Gross, I., Martin, G.R., Lufkin, T., McMahon, A.P., et al. (2005). Sprouty1 is a critical regulator of GDNF/RET-mediated kidney induction. *Dev Cell* 8, 229-239.
  132. Quaggin, S.E., Schwartz, L., Cui, S., Igarashi, P., Deimling, J., Post, M., and Rossant, J. (1999). The basic-helix-loop-helix protein pod1 is critically important for kidney and lung organogenesis. *Development* 126, 5771-5783.
  133. Yamaguchi, Y., Yonemura, S., and Takada, S. (2006). Grainyhead-related transcription factor is required for duct maturation in the salivary gland and the kidney of the mouse. *Development* 133, 4737-4748.
  134. Short, K.M., Hodson, M.J., and Smyth, I.M. (2010). Tomographic quantification of branching morphogenesis and renal development. *Kidney Int* 77, 1132-1139.
  135. Walker, K.A., Sims-Lucas, S., Caruana, G., Cullen-McEwen, L., Li, J., Sarraj, M.A., Bertram, J.F., and Stenvers, K.L. (2011). Betaglycan is required for the establishment of nephron endowment in the mouse. *PLoS One* 6, e18723.
  136. Gui, T., Sun, Y., Gai, Z., Shimokado, A., Muragaki, Y., and Zhou, G. (2013). The loss of *Trps1* suppresses ureteric bud branching because of the activation of TGF-beta signaling. *Dev Biol* 377, 415-427.
  137. Caubit, X., Lye, C.M., Martin, E., Core, N., Long, D.A., Vola, C., Jenkins, D., Garratt, A.N., Skaer, H., Woolf, A.S., et al. (2008). Teashirt 3 is necessary for ureteral smooth muscle differentiation downstream of SHH and BMP4. *Development* 135, 3301-3310.
  138. Majumdar, A., Vainio, S., Kispert, A., McMahon, J., and McMahon, A.P. (2003). Wnt11 and *Ret/Gdnf* pathways cooperate in regulating ureteric branching during metanephric kidney development. *Development* 130, 3175-3185.
  139. Yu, J., Carroll, T.J., Rajagopal, J., Kobayashi, A., Ren, Q., and McMahon, A.P. (2009). A Wnt7b-dependent pathway regulates the orientation of epithelial cell division and establishes the cortico-medullary axis of the mammalian kidney. *Development* 136, 161-171.
  140. Carroll, T.J., Park, J.S., Hayashi, S., Majumdar, A., and McMahon, A.P. (2005). Wnt9b plays a central role in the regulation of mesenchymal to epithelial transitions underlying organogenesis of the mammalian urogenital system. *Dev Cell* 9, 283-292.
  141. Kreidberg, J.A., Sariola, H., Loring, J.M., Maeda, M., Pelletier, J., Housman, D., and Jaenisch, R. (1993). WT-1 is required for early kidney development. *Cell* 74, 679-691.
  142. Reginensi, A., Scott, R.P., Gregorieff, A., Bagherie-Lachidan, M., Chung, C., Lim, D.S., Pawson, T., Wrana, J., and McNeill, H. (2013). Yap- and Cdc42-dependent nephrogenesis and morphogenesis during mouse kidney development. *PLoS Genet* 9, e1003380.
  143. Cizelsky, W., Tata, A., Kuhl, M., and Kuhl, S.J. (2014). The Wnt/JNK signaling target gene *alcam* is required for embryonic kidney development. *Development* 141, 2064-2074.
  144. Ranghini, E.J., and Dressler, G.R. (2015). Evidence for intermediate mesoderm and kidney progenitor cell specification by Pax2 and PTIP dependent mechanisms. *Dev Biol* 399, 296-305.
  145. Mana-Capelli, S., Paramasivam, M., Dutta, S., and McCollum, D. (2014). Angiomotins link F-actin architecture to Hippo pathway signaling. *Mol Biol Cell* 25, 1676-1685.

146. Phua, Y.L., Chu, J.Y., Marrone, A.K., Bodnar, A.J., Sims-Lucas, S., and Ho, J. (2015). Renal stromal miRNAs are required for normal nephrogenesis and glomerular mesangial survival. *Physiol Rep* 3.
147. Nicolaou, N., Margadant, C., Kevelam, S.H., Lilien, M.R., Oosterveld, M.J., Kreft, M., van Eerde, A.M., Pfundt, R., Terhal, P.A., van der Zwaag, B., et al. (2012). Gain of glycosylation in integrin alpha3 causes lung disease and nephrotic syndrome. *J Clin Invest* 122, 4375-4387.
148. Goldman, M., Smith, A., Shuman, C., Caluseriu, O., Wei, C., Steele, L., Ray, P., Sadowski, P., Squire, J., Weksberg, R., et al. (2002). Renal abnormalities in bekwitwiedemann syndrome are associated with 11p15.5 uniparental disomy. *J Am Soc Nephrol* 13, 2077-2084.
149. Metsuyanin, S., Harari-Steinberg, O., Buzhor, E., Omer, D., Pode-Shakked, N., Ben-Hur, H., Halperin, R., Schneider, D., and Dekel, B. (2009). Expression of stem cell markers in the human fetal kidney. *PLoS One* 4, e6709.
150. Sims-Lucas, S., Di Giovanni, V., Schaefer, C., Cusack, B., Eswarakumar, V.P., and Bates, C.M. (2012). Ureteric morphogenesis requires Fgfr1 and Fgfr2/Frs2alpha signaling in the metanephric mesenchyme. *J Am Soc Nephrol* 23, 607-617.
151. Bagherie-Lachidan, M., Reginensi, A., Pan, Q., Zaveri, H.P., Scott, D.A., Blencowe, B.J., Helmbacher, F., and McNeill, H. (2015). Stromal Fat4 acts non-autonomously with Dchs1/2 to restrict the nephron progenitor pool. *Development* 142, 2564-2573.
152. Takayama, M., Miyatake, K., and Nishida, E. (2014). Identification and characterization of retinoic acid-responsive genes in mouse kidney development. *Genes Cells* 19, 637-649.
153. Kurokawa, K., Kawai, K., Hashimoto, M., Ito, Y., and Takahashi, M. (2003). Cell signalling and gene expression mediated by RET tyrosine kinase. *J Intern Med* 253, 627-633.
154. Ye, X., Wang, Y., Rattner, A., and Nathans, J. (2011). Genetic mosaic analysis reveals a major role for frizzled 4 and frizzled 8 in controlling ureteric growth in the developing kidney. *Development* 138, 1161-1172.
155. Zhang, B., Tran, U., and Wessely, O. (2011). Expression of Wnt signaling components during Xenopus pronephros development. *PLoS One* 6, e26533.
156. Hu, M.C., Mo, R., Bhella, S., Wilson, C.W., Chuang, P.T., Hui, C.C., and Rosenblum, N.D. (2006). GLI3-dependent transcriptional repression of Gli1, Gli2 and kidney patterning genes disrupts renal morphogenesis. *Development* 133, 569-578.
157. Weber, S., Landwehr, C., Renkert, M., Hoischen, A., Wuhl, E., Denecke, J., Radlwimmer, B., Haffner, D., Schaefer, F., and Weber, R.G. (2011). Mapping candidate regions and genes for congenital anomalies of the kidneys and urinary tract (CAKUT) by array-based comparative genomic hybridization. *Nephrol Dial Transplant* 26, 136-143.
158. Rilla, K., Pasonen-Seppanen, S., Karna, R., Karjalainen, H.M., Torronen, K., Koistinen, V., Tammi, M.I., Tammi, R.H., Teravainen, T., and Manninen, A. (2012). HAS3-induced accumulation of hyaluronan in 3D MDCK cultures results in mitotic spindle misorientation and disturbed organization of epithelium. *Histochem Cell Biol* 137, 153-164.
159. Hurtado, R., Bub, G., and Herzlinger, D. (2010). The pelvis-kidney junction contains HCN3, a hyperpolarization-activated cation channel that triggers ureter peristalsis. *Kidney Int* 77, 500-508.
160. Santos, O.F., Barros, E.J., Yang, X.M., Matsumoto, K., Nakamura, T., Park, M., and Nigam, S.K. (1994). Involvement of hepatocyte growth factor in kidney development. *Dev Biol* 163, 525-529.



161. Brunskill, E.W., Park, J.S., Chung, E., Chen, F., Magella, B., and Potter, S.S. (2014). Single cell dissection of early kidney development: multilineage priming. *Development* 141, 3093-3101.
162. Fu, Y., Li, F., Zhao, D.Y., Zhang, J.S., Lv, Y., and Li-Ling, J. (2014). Interaction between *Tbx1* and *Hoxd10* and connection with TGFbeta-BMP signal pathway during kidney development. *Gene* 536, 197-202.
163. Reggiani, L., Raciti, D., Airik, R., Kispert, A., and Brandli, A.W. (2007). The prepattern transcription factor *Irx3* directs nephron segment identity. *Genes Dev* 21, 2358-2370.
164. McGrath-Morrow, S., Cho, C., Molls, R., Burne-Taney, M., Haas, M., Hicklin, D.J., Tuder, R., and Rabb, H. (2006). VEGF receptor 2 blockade leads to renal cyst formation in mice. *Kidney Int* 69, 1741-1748.
165. Rangel, E.B., Gomes, S.A., Dulce, R.A., Premer, C., Rodrigues, C.O., Kanashiro-Takeuchi, R.M., Oskouei, B., Carvalho, D.A., Ruiz, P., Reiser, J., et al. (2013). C-kit(+) cells isolated from developing kidneys are a novel population of stem cells with regenerative potential. *Stem Cells* 31, 1644-1656.
166. Oka, T., Mazack, V., and Sudol, M. (2008). Mst2 and Lats kinases regulate apoptotic function of Yes kinase-associated protein (YAP). *J Biol Chem* 283, 27534-27546.
167. Yamanaka, T., Horikoshi, Y., Izumi, N., Suzuki, A., Mizuno, K., and Ohno, S. (2006). Lgl mediates apical domain disassembly by suppressing the PAR-3-aPKC-PAR-6 complex to orient apical membrane polarity. *J Cell Sci* 119, 2107-2118.
168. Nikopoulos, G.N., Martins, J.F., Adams, T.L., Karaczyn, A., Adams, D., Vary, C., Oxburgh, L., and Verdi, J.M. (2009). NRAGE: a potential rheostat during branching morphogenesis. *Mech Dev* 126, 337-349.
169. Hilliard, S., Aboudehen, K., Yao, X., and El-Dahr, S.S. (2011). Tight regulation of p53 activity by Mdm2 is required for ureteric bud growth and branching. *Dev Biol* 353, 354-366.
170. Li, Y., Cheng, C.N., Verdun, V.A., and Wingert, R.A. (2014). Zebrafish nephrogenesis is regulated by interactions between retinoic acid, mecom, and Notch signaling. *Dev Biol* 386, 111-122.
171. Schwab, K., Hartman, H.A., Liang, H.C., Aronow, B.J., Patterson, L.T., and Potter, S.S. (2006). Comprehensive microarray analysis of *Hoxa11/Hoxd11* mutant kidney development. *Dev Biol* 293, 540-554.
172. Woolf, A.S., Kolatsi-Joannou, M., Hardman, P., Andermarcher, E., Moorby, C., Fine, L.G., Jat, P.S., Noble, M.D., and Gherardi, E. (1995). Roles of hepatocyte growth factor/scatter factor and the met receptor in the early development of the metanephros. *J Cell Biol* 128, 171-184.
173. Hellman, N.E., Spector, J., Robinson, J., Zuo, X., Saunier, S., Antignac, C., Tobias, J.W., and Lipschutz, J.H. (2008). Matrix metalloproteinase 13 (MMP13) and tissue inhibitor of matrix metalloproteinase 1 (TIMP1), regulated by the MAPK pathway, are both necessary for Madin-Darby canine kidney tubulogenesis. *J Biol Chem* 283, 4272-4282.
174. Harari-Steinberg, O., Metsuyanin, S., Omer, D., Gnatek, Y., Gershon, R., Pri-Chen, S., Ozdemir, D.D., Lerenthal, Y., Noiman, T., Ben-Hur, H., et al. (2013). Identification of human nephron progenitors capable of generation of kidney structures and functional repair of chronic renal disease. *EMBO Mol Med* 5, 1556-1568.
175. Piccolo, S., Dupont, S., and Cordenonsi, M. (2014). The biology of YAP/TAZ: hippo signaling and beyond. *Physiol Rev* 94, 1287-1312.
176. Grasberger, H., Ringkananont, U., Lefrancois, P., Abramowicz, M., Vassart, G., and Refetoff, S. (2005). Thyroid transcription factor 1 rescues PAX8/p300 synergism

- impaired by a natural PAX8 paired domain mutation with dominant negative activity. *Mol Endocrinol* 19, 1779-1791.
177. Thiagarajan, R.D., Georgas, K.M., Rumballe, B.A., Lesieur, E., Chiu, H.S., Taylor, D., Tang, D.T., Grimmond, S.M., and Little, M.H. (2011). Identification of anchor genes during kidney development defines ontological relationships, molecular subcompartments and regulatory pathways. *PLoS One* 6, e17286.
  178. Zhao, D., Desai, S., and Zeng, H. (2011). VEGF stimulates PKD-mediated CREB-dependent orphan nuclear receptor *Nurr1* expression: role in VEGF-induced angiogenesis. *Int J Cancer* 128, 2602-2612.
  179. Lan, Y., Kingsley, P.D., Cho, E.S., and Jiang, R. (2001). *Osr2*, a new mouse gene related to *Drosophila* odd-skipped, exhibits dynamic expression patterns during craniofacial, limb, and kidney development. *Mech Dev* 107, 175-179.
  180. Lechner, M.S., Levitan, I., and Dressler, G.R. (2000). PTIP, a novel BRCT domain-containing protein interacts with Pax2 and is associated with active chromatin. *Nucleic Acids Res* 28, 2741-2751.
  181. Boualia, S.K., Gaitan, Y., Tremblay, M., Sharma, R., Cardin, J., Kania, A., and Bouchard, M. (2013). A core transcriptional network composed of Pax2/8, Gata3 and Lim1 regulates key players of pro/mesonephros morphogenesis. *Dev Biol* 382, 555-566.
  182. Abraham, S., Paknikar, R., Bhumbra, S., Luan, D., Garg, R., Dressler, G.R., and Patel, S.R. (2015). The Groucho-associated phosphatase PPM1B displaces Pax transactivation domain interacting protein (PTIP) to switch the transcription factor Pax2 from a transcriptional activator to a repressor. *J Biol Chem* 290, 7185-7194.
  183. Li, X., Hyink, D.P., Polgar, K., Gusella, G.L., Wilson, P.D., and Burrow, C.R. (2005). Protein kinase X activates ureteric bud branching morphogenesis in developing mouse metanephric kidney. *J Am Soc Nephrol* 16, 3543-3552.
  184. Willecke, R., Heuberger, J., Grossmann, K., Michos, O., Schmidt-Ott, K., Walentin, K., Costantini, F., and Birchmeier, W. (2011). The tyrosine phosphatase *Shp2* acts downstream of GDNF/Ret in branching morphogenesis of the developing mouse kidney. *Dev Biol* 360, 310-317.
  185. Rong, X., Chen, C., Zhou, P., Zhou, Y., Li, Y., Lu, L., Liu, Y., Zhou, J., and Duan, C. (2014). R-spondin 3 regulates dorsoventral and anteroposterior patterning by antagonizing Wnt/beta-catenin signaling in zebrafish embryos. *PLoS One* 9, e99514.
  186. Yates, L.L., Papakrivopoulou, J., Long, D.A., Goggolidou, P., Connolly, J.O., Woolf, A.S., and Dean, C.H. (2010). The planar cell polarity gene *Vangl2* is required for mammalian kidney-branching morphogenesis and glomerular maturation. *Hum Mol Genet* 19, 4663-4676.
  187. Sampson, M.G., Coughlin, C.R., 2nd, Kaplan, P., Conlin, L.K., Meyers, K.E., Zackai, E.H., Spinner, N.B., and Copelovitch, L. (2010). Evidence for a recurrent microdeletion at chromosome 16p11.2 associated with congenital anomalies of the kidney and urinary tract (CAKUT) and Hirschsprung disease. *Am J Med Genet A* 152A, 2618-2622.
  188. Kiefer, S.M., Robbins, L., Barina, A., Zhang, Z., and Rauchman, M. (2008). SALL1 truncated protein expression in Townes-Brocks syndrome leads to ectopic expression of downstream genes. *Hum Mutat* 29, 1133-1140.
  189. Cheng, C.N., and Wingert, R.A. (2015). Nephron proximal tubule patterning and corpuscles of Stannius formation are regulated by the *sim1a* transcription factor and retinoic acid in zebrafish. *Dev Biol* 399, 100-116.

190. Cain, J.E., Islam, E., Haxho, F., Chen, L., Bridgewater, D., Nieuwenhuis, E., Hui, C.C., and Rosenblum, N.D. (2009). GLI3 repressor controls nephron number via regulation of Wnt11 and Ret in ureteric tip cells. *PLoS One* 4, e7313.
191. Grande, M.T., Sanchez-Laorden, B., Lopez-Blau, C., De Frutos, C.A., Boutet, A., Arevalo, M., Rowe, R.G., Weiss, S.J., Lopez-Novoa, J.M., and Nieto, M.A. (2015). Snail1-induced partial epithelial-to-mesenchymal transition drives renal fibrosis in mice and can be targeted to reverse established disease. *Nat Med* 21, 989-997.
192. Wang, L.F., Wu, H., Xu, Y., Deng, M., Han, X.L., and Bai, D. (2015). Effect of SOST gene deletion on the progression of renal interstitial fibrosis in obstructive kidney injury. *Ren Fail* 37, 1514-1517.
193. Chi, L., Zhang, S., Lin, Y., Prunskaitė-Hyyryläinen, R., Vuolteenaho, R., Itaranta, P., and Vainio, S. (2004). Sprouty proteins regulate ureteric branching by coordinating reciprocal epithelial Wnt11, mesenchymal Gdnf and stromal Fgf7 signalling during kidney development. *Development* 131, 3345-3356.
194. Takashima, Y., Keino-Masu, K., Yashiro, H., Hara, S., Suzuki, T., van Kuppevelt, T.H., Masu, M., and Nagata, M. (2016). Heparan sulfate 6-O-endosulfatases, Sulf1 and Sulf2, regulate glomerular integrity by modulating growth factor signaling. *Am J Physiol Renal Physiol* 310, F395-408.
195. Wensing, L.A., and Campos, A.H. (2014). TBX3, a downstream target of TGF-beta1, inhibits mesangial cell apoptosis. *Exp Cell Res* 328, 340-350.
196. Qiao, X., Roth, I., Feraille, E., and Hasler, U. (2014). Different effects of ZO-1, ZO-2 and ZO-3 silencing on kidney collecting duct principal cell proliferation and adhesion. *Cell Cycle* 13, 3059-3075.
197. Tufro, A., Norwood, V.F., Carey, R.M., and Gomez, R.A. (1999). Vascular endothelial growth factor induces nephrogenesis and vasculogenesis. *J Am Soc Nephrol* 10, 2125-2134.
198. Ola, R., Jakobson, M., Kvist, J., Perala, N., Kuure, S., Braunewell, K.H., Bridgewater, D., Rosenblum, N.D., Chilov, D., Immonen, T., et al. (2011). The GDNF target Vsn11 marks the ureteric tip. *J Am Soc Nephrol* 22, 274-284.
199. Patel, N., Sharpe, P.T., and Miletich, I. (2011). Coordination of epithelial branching and salivary gland lumen formation by Wnt and FGF signals. *Dev Biol* 358, 156-167.
200. Xiong, M., Jiang, L., Zhou, Y., Qiu, W., Fang, L., Tan, R., Wen, P., and Yang, J. (2012). The miR-200 family regulates TGF-beta1-induced renal tubular epithelial to mesenchymal transition through Smad pathway by targeting ZEB1 and ZEB2 expression. *Am J Physiol Renal Physiol* 302, F369-379.
201. Mittaz, L., Russell, D.L., Wilson, T., Brasted, M., Tkalcevic, J., Salamonsen, L.A., Hertzog, P.J., and Pritchard, M.A. (2004). Adams-1 is essential for the development and function of the urogenital system. *Biol Reprod* 70, 1096-1105.
202. Bohnenpoll, T., and Kispert, A. (2014). Ureter growth and differentiation. *Semin Cell Dev Biol* 36, 21-30.
203. Bell, S.M., Zhang, L., Mendell, A., Xu, Y., Haitchi, H.M., Lessard, J.L., and Whitsett, J.A. (2011). Kruppel-like factor 5 is required for formation and differentiation of the bladder urothelium. *Dev Biol* 358, 79-90.
204. Motamedi, F.J., Badro, D.A., Clarkson, M., Lecca, M.R., Bradford, S.T., Buske, F.A., Saar, K., Hubner, N., Brandli, A.W., and Schedl, A. (2014). WT1 controls antagonistic FGF and BMP-pSMAD pathways in early renal progenitors. *Nat Commun* 5, 4444.
205. Kann, M., Bae, E., Lenz, M.O., Li, L., Trannguyen, B., Schumacher, V.A., Taglienti, M.E., Bordeianou, L., Hartwig, S., Rinschen, M.M., et al. (2015). WT1 targets Gas1 to

- maintain nephron progenitor cells by modulating FGF signals. *Development* 142, 1254-1266.
206. Heliot, C., Desgrange, A., Buisson, I., Prunskaitė-Hyyryläinen, R., Shan, J., Vainio, S., Umbhauer, M., and Cereghini, S. (2013). HNF1B controls proximal-intermediate nephron segment identity in vertebrates by regulating Notch signalling components and *Irx1/2*. *Development* 140, 873-885.
  207. Adzhubei, I.A., Schmidt, S., Peshkin, L., Ramensky, V.E., Gerasimova, A., Bork, P., Kondrashov, A.S., and Sunyaev, S.R. (2010). A method and server for predicting damaging missense mutations. *Nat Methods* 7, 248-249.
  208. Kumar, P., Henikoff, S., and Ng, P.C. (2009). Predicting the effects of coding non-synonymous variants on protein function using the SIFT algorithm. *Nat Protoc* 4, 1073-1081.
  209. Schwarz, J.M., Cooper, D.N., Schuelke, M., and Seelow, D. (2014). MutationTaster2: mutation prediction for the deep-sequencing age. *Nat Methods* 11, 361-362.
  210. Grantham, R. (1974). Amino acid difference formula to help explain protein evolution. *Science* 185, 862-864.
  211. Tavtigian, S.V., Deffenbaugh, A.M., Yin, L., Judkins, T., Scholl, T., Samollow, P.B., de Silva, D., Zharkikh, A., and Thomas, A. (2006). Comprehensive statistical study of 452 BRCA1 missense substitutions with classification of eight recurrent substitutions as neutral. *J Med Genet* 43, 295-305.
  212. Houdayer, C. (2011). In silico prediction of splice-affecting nucleotide variants. *Methods Mol Biol* 760, 269-281.
  213. Samocha, K.E., Robinson, E.B., Sanders, S.J., Stevens, C., Sabo, A., McGrath, L.M., Kosmicki, J.A., Rehnström, K., Mallick, S., Kirby, A., et al. (2014). A framework for the interpretation of de novo mutation in human disease. *Nat Genet* 46, 944-950.
  214. Velman, J.A., and Brunner, H.G. (2012). De novo mutations in human genetic disease. *Nat Rev Genet* 13, 565-575
